# Supplementary material for: Exon-Enriched Libraries Reveal Large Genic Differences Between Aedes aegypti from Senegal, West Africa, and Populations Outside Africa
Source: Oxford University Press journal article supplement (doi:10.1534/g3.116.036053), 2017-02-01
Supplement: 036053_tables1.pdf [file 036053_tables1.pdf]

Table S1. Genes in the lower 1% of H<sub>exp</sub> values.

| VectorBase ID | Collection | Hexp              | No. SNPs      | Function* | Description                          |
|---------------|------------|-------------------|---------------|-----------|--------------------------------------|
| AAEL007935-RE | K          | 0.000             | 8             | CSR       | AaGr20a                              |
| AAEL017370-RA | K          | 0.001             | 361           | CSR       | odorant receptor                     |
| AAEL010277-RA | M          | 0.001             | 1611          | CSR       | AaGr28                               |
| AAEL017130-RA | M          | 0.000             | 193           | CSR       | AaGr51                               |
| AAEL015499-RA | PKT        | 0.001,0.001,0.000 | 548, 476, 479 | CSR       | 5p-1177 odorant-binding ptn 56a      |
| AAEL002626-RA | T          | 0.001             | 739           | CSR       | odorant-binding ptn 56e              |
| AAEL009004-RA | M          | 0.001             | 520           | CYT/STR   | Cuticle ptn                          |
| AAEL011444-RA | M          | 0.001             | 1047          | CYT/STR   | pupal cuticle ptn                    |
| AAEL006651-RA | P          | 0.001             | 3058          | CYT/STR   | dystrophin                           |
| AAEL008999-RA | PT         | 0.000,0.000       | 117, 407      | CYT/STR   | adult cuticle ptn                    |
| AAEL000205-RA | K          | 0.001             | 479           | DIV       | hypo. ptn                            |
| AAEL000573-RA | K          | 0.001             | 323           | DIV       | grainyhead                           |
| AAEL001873-RA | K          | 0.001             | 710           | DIV       | hypo. ptn                            |
| AAEL002517-RB | K          | 0.000             | 8             | DIV       | nucleoptn                            |
| AAEL002807-RA | K          | 0.000             | 45            | DIV       | hypo. ptn                            |
| AAEL002859-RA | K          | 0.000             | 42            | DIV       | hypo. ptn                            |
| AAEL003484-RA | K          | 0.000             | 30            | DIV       | zinc finger                          |
| AAEL003547-RA | K          | 0.000             | 21            | DIV       | zinc finger                          |
| AAEL003672-RA | K          | 0.001             | 1497          | DIV       | zinc finger                          |
| AAEL003679-RA | K          | 0.001             | 1922          | DIV       | zinc finger                          |
| AAEL004307-RB | K          | 0.000             | 41            | DIV       | n-myc downstream regulated           |
| AAEL004420-RB | K          | 0.000             | 3             | DIV       | nucleoside triphosphate hydrolase    |
| AAEL004835-RA | K          | 0.000             | 11            | DIV       | conserved hypo. ptn                  |
| AAEL005502-RA | K          | 0.000             | 48            | DIV       | Kinesin light chain                  |
| AAEL005867-RA | K          | 0.001             | 1678          | DIV       | Probable serine/threonine-ptn kinase |
| AAEL006313-RA | K          | 0.000             | 10            | DIV       | conserved hypo. ptn                  |
| AAEL006575-RC | K          | 0.000             | 8             | DIV       | troponin C                           |
| AAEL006931-RC | K          | 0.000             | 2             | DIV       | hypo. ptn                            |
| AAEL007495-RC | K          | 0.000             | 40            | DIV       | phosphoglycerate mutase              |
| AAEL007913-RA | K          | 0.000             | 213           | DIV       | sulfotransferase (sult)              |
| AAEL008104-RA | K          | 0.000             | 16            | DIV       | fibrinogen and fibronectin           |
| AAEL008263-RA | K          | 0.001             | 712           | DIV       | YY1-associated factor                |
| AAEL008325-RA | K          | 0.001             | 189           | DIV       | hypo. ptn                            |

|               |     |                   |              |     |                                       |
|---------------|-----|-------------------|--------------|-----|---------------------------------------|
| AAEL008454-RB | K   | 0.001             | 943          | DIV | Isochorismatase dom-containing        |
| AAEL008834-RB | K   | 0.000             | 6            | DIV | Tudor dom-containing                  |
| AAEL010067-RA | K   | 0.001             | 968          | DIV | spitz                                 |
| AAEL010763-RA | K   | 0.001             | 574          | DIV | hypo. ptn                             |
| AAEL011116-RC | K   | 0.000             | 14           | DIV | 14-33 ptn sigma gamma zeta beta/alpha |
| AAEL011972-RB | K   | 0.000             | 40           | DIV | actin binding ptn                     |
| AAEL012172-RA | K   | 0.001             | 1137         | DIV | methylthioadenosine phosphorylase     |
| AAEL012188-RA | K   | 0.001             | 123          | DIV | hypo. ptn                             |
| AAEL012476-RA | K   | 0.001             | 1134         | DIV | RILP-like ptn                         |
| AAEL012663-RA | K   | 0.001             | 1176         | DIV | prolylcarboxypeptidase                |
| AAEL013395-RC | K   | 0.000             | 50           | DIV | hypo. ptn                             |
| AAEL013945-RA | K   | 0.001             | 685          | DIV | MLX-interacting                       |
| AAEL013949-RA | K   | 0.001             | 1433         | DIV | hypo. ptn                             |
| AAEL017253-RD | K   | 0.000             | 2            | DIV | methionine sulphoxide reductase MsrA  |
| AAEL017462-RC | K   | 0.000             | 27           | DIV | Hippocampus abundant transcript 1     |
| AAEL017509-RA | KM  | 0.000,0.000       | 1, 6         | DIV | hypo. ptn                             |
| AAEL015302-RA | KMT | 0.000,0.001,0.001 | 78, 643, 605 | DIV | Pleckstrin homology dom               |
| AAEL001157-RA | KT  | 0.001,0.001       | 1674, 1649   | DIV | light ptn                             |
| AAEL006926-RA | KT  | 0.001,0.001       | 2254, 2202   | DIV | hypo. ptn                             |
| AAEL009497-RA | KT  | 0.000,0.000       | 51, 61       | DIV | phosphomannomutase                    |
| AAEL011224-RA | KT  | 0.000,0.000       | 190, 171     | DIV | hypo. ptn                             |
| AAEL016985-RA | KT  | 0.001, 0.001      | 361, 337     | DIV | transmembrane dom                     |
| AAEL000319-RA | M   | 0.000             | 26           | DIV | hypo. ptn                             |
| AAEL001064-RA | M   | 0.000             | 15           | DIV | triacylglycerol lipase                |
| AAEL001577-RA | M   | 0.000             | 2            | DIV | conserved hypo. ptn                   |
| AAEL001966-RA | M   | 0.000             | 88           | DIV | zinc finger ptn                       |
| AAEL002198-RA | M   | 0.001             | 287          | DIV | oligosaccharyltransferase complex     |
| AAEL002226-RA | M   | 0.001             | 1385         | DIV | casein kinase                         |
| AAEL002232-RA | M   | 0.001             | 1428         | DIV | Ribonuclease P ptn subunit p30        |
| AAEL002381-RA | M   | 0.001             | 259          | DIV | High mobility group ptn D             |
| AAEL004071-RA | M   | 0.001             | 628          | DIV | nitrogen fixation ptn nifu            |
| AAEL004999-RA | M   | 0.000             | 3            | DIV | hypo. ptn                             |
| AAEL005514-RA | M   | 0.001             | 557          | DIV | hypo. ptn                             |
| AAEL005572-RA | M   | 0.000             | 28           | DIV | hypo. ptn                             |
| AAEL005715-RA | M   | 0.001             | 778          | DIV | Nudix hydrolase dom                   |
| AAEL005756-RC | M   | 0.000             | 3            | DIV | Rhodanese-like dom                    |

|               |   |       |      |     |                                                  |
|---------------|---|-------|------|-----|--------------------------------------------------|
| AAEL006128-RA | M | 0.001 | 3358 | DIV | Meckelin                                         |
| AAEL006135-RA | M | 0.001 | 1627 | DIV | 20 Kd nuclear cap binding ptn                    |
| AAEL006188-RB | M | 0.000 | 9    | DIV | CDC42 small effector ptn                         |
| AAEL006359-RA | M | 0.000 | 38   | DIV | sulfotransferase (sult)                          |
| AAEL006602-RA | M | 0.000 | 13   | DIV | hypo. ptn                                        |
| AAEL007025-RA | M | 0.001 | 1403 | DIV | hypo. ptn                                        |
| AAEL007529-RA | M | 0.001 | 1323 | DIV | nucleoptn                                        |
| AAEL007736-RA | M | 0.001 | 1507 | DIV | forkhead ptn/ forkhead ptn dom                   |
| AAEL008105-RB | M | 0.001 | 1179 | DIV | glutamate cysteine ligase                        |
| AAEL009298-RA | M | 0.001 | 1270 | DIV | 2-Keto-3-deoxy-(6-phospho-)gluconate aldolase    |
| AAEL009361-RA | M | 0.000 | 16   | DIV | insect cationic amino acid transporter 2 (iCAT2) |
| AAEL009452-RA | M | 0.000 | 14   | DIV | hypo. ptn                                        |
| AAEL009627-RA | M | 0.000 | 2    | DIV | hypo. ptn                                        |
| AAEL010128-RA | M | 0.000 | 8    | DIV | LRIM4                                            |
| AAEL010205-RB | M | 0.000 | 35   | DIV | conserved hypo. ptn                              |
| AAEL010824-RA | M | 0.000 | 2    | DIV | seminal fluid ptn                                |
| AAEL010901-RB | M | 0.000 | 70   | DIV | mannose binding lectin                           |
| AAEL011545-RA | M | 0.001 | 380  | DIV | cxyorf1                                          |
| AAEL011546-RA | M | 0.000 | 5    | DIV | Vacuolar ATPase assemb integral memb             |
| AAEL011558-RA | M | 0.000 | 65   | DIV | VMA21-like                                       |
| AAEL011578-RA | M | 0.001 | 1748 | DIV | metalloptnase                                    |
| AAEL011606-RA | M | 0.000 | 2    | DIV | serine/threonine ptn kinase                      |
| AAEL011830-RG | M | 0.000 | 1    | DIV | Transmembrane ptn                                |
| AAEL012896-RA | M | 0.000 | 74   | DIV | APAF1-interacting                                |
| AAEL013165-RA | M | 0.001 | 409  | DIV | Zinc finger HIT dom-containing                   |
| AAEL013276-RA | M | 0.000 | 78   | DIV | Zinc finger                                      |
| AAEL013574-RB | M | 0.000 | 32   | DIV | acid phosphatase                                 |
| AAEL013596-RA | M | 0.001 | 2003 | DIV | apolipoptn D                                     |
| AAEL013716-RA | M | 0.000 | 1    | DIV | phosphatidylinositol 3-kinase regulatory subunit |
| AAEL013913-RA | M | 0.001 | 335  | DIV | Methenyltetrahydrofolate synthetase dom          |
| AAEL014376-RA | M | 0.000 | 6    | DIV | hypo. ptn                                        |
| AAEL014397-RA | M | 0.001 | 207  | DIV | hypo. ptn                                        |
| AAEL014519-RA | M | 0.001 | 721  | DIV | grauzone                                         |
| AAEL014812-RA | M | 0.000 | 103  | DIV | cbl-d                                            |
| AAEL015597-RA | M | 0.000 | 469  | DIV | hypo. ptn                                        |
|               |   |       |      | DIV | Pleckstrin homology dom                          |

|               |    |              |            |     |                                              |
|---------------|----|--------------|------------|-----|----------------------------------------------|
| AAEL017033-RA | M  | 0.001        | 151        | DIV | Disintegrin and metalloptnase dom            |
| AAEL017109-RA | M  | 0.001        | 431        | DIV | hypo. ptn                                    |
| AAEL001783-RA | MT | 0.000,0.000  | 7,1        | DIV | MSF1 ptn                                     |
| AAEL002361-RA | MT | 0.000,0.000  | 3, 26      | DIV | conserved hypo. ptn                          |
| AAEL003521-RA | MT | 0.001,0.001  | 373, 363   | DIV | Calcium-transporting ATPase type 2C member 1 |
| AAEL006270-RA | MT | 0.000,0.001  | 1133, 1167 | DIV | RAG1-activating ptn                          |
| AAEL011951-RB | MT | 0.001, 0.001 | 407, 421   | DIV | elongase                                     |
| AAEL012022-RA | MT | 0.000,0.000  | 72, 5      | DIV | hypo. ptn                                    |
| AAEL000150-RA | P  | 0.001        | 993        | DIV | nitrilase                                    |
| AAEL000318-RA | PT | 0.000,0.000  | 112,79     | DIV | conserved hypo. ptn                          |
| AAEL000475-RB | P  | 0.000        | 2          | DIV | Beta-catenin-like ptn 1                      |
| AAEL000680-RA | P  | 0.000        | 4          | DIV | hypo. ptn                                    |
| AAEL001416-RA | P  | 0.000        | 15         | DIV | Inner nuclear membrane ptn Man1              |
| AAEL001486-RA | P  | 0.000        | 61         | DIV | Male-specific sperm ptn                      |
| AAEL001644-RA | P  | 0.000        | 1          | DIV | Transmembrane ptn C9orf46                    |
| AAEL001679-RA | P  | 0.000        | 7          | DIV | hypo. ptn                                    |
| AAEL001822-RA | P  | 0.000        | 4          | DIV | glucosyl/glucuronosyl transferases           |
| AAEL002060-RA | P  | 0.000        | 40         | DIV | B box-binding                                |
| AAEL002428-RA | P  | 0.001        | 94         | DIV | BTB/POZ dom-containing                       |
| AAEL003323-RA | P  | 0.000        | 9          | DIV | hypo. ptn                                    |
| AAEL003348-RC | P  | 0.000        | 3          | DIV | hypo. ptn                                    |
| AAEL003376-RA | P  | 0.000        | 10         | DIV | hypo. ptn                                    |
| AAEL003880-RA | P  | 0.001        | 142        | DIV | hypo. ptn                                    |
| AAEL004351-RB | P  | 0.000        | 1          | DIV | casein kinase                                |
| AAEL006929-RA | P  | 0.001        | 3522       | DIV | cullin                                       |
| AAEL007307-RA | P  | 0.001        | 2898       | DIV | Golgi complex subunit 7                      |
| AAEL007407-RA | P  | 0.000        | 22         | DIV | hypo. ptn                                    |
| AAEL007640-RA | P  | 0.000        | 19         | DIV | molybdopterin synthase large subunit         |
| AAEL008057-RA | P  | 0.001        | 2374       | DIV | myosin light chain kinase                    |
| AAEL008379-RC | P  | 0.000        | 16         | DIV | P38 mapk                                     |
| AAEL009305-RA | P  | 0.001        | 2208       | DIV | numb-associated kinase                       |
| AAEL009306-RA | P  | 0.001        | 1008       | DIV | conserved hypo. ptn                          |
| AAEL009319-RA | P  | 0.001        | 494        | DIV | hypo. ptn                                    |
| AAEL009741-RA | P  | 0.001        | 436        | DIV | low complexity ptn                           |
| AAEL010446-RA | P  | 0.000        | 381        | DIV | ptn phosphatase 2c                           |
| AAEL010726-RA | P  | 0.000        | 1          | DIV | hypo. ptn                                    |

|               |    |              |            |     |                                                                                |
|---------------|----|--------------|------------|-----|--------------------------------------------------------------------------------|
| AAEL010802-RA | P  | 0.000        | 43         | DIV | conserved hypo. ptn                                                            |
| AAEL011053-RA | P  | 0.000        | 42         | DIV | Zinc finger ptn 337                                                            |
| AAEL011147-RA | P  | 0.001        | 819        | DIV | Integrator complex subunit 2                                                   |
| AAEL011262-RA | P  | 0.000        | 7          | DIV | hypo. ptn                                                                      |
| AAEL011500-RB | P  | 0.000        | 14         | DIV | Cdc42 ptn                                                                      |
| AAEL011620-RA | P  | 0.000        | 4          | DIV | hypo. ptn                                                                      |
| AAEL011807-RA | P  | 0.001        | 1048       | DIV | conserved hypo. ptn                                                            |
| AAEL011957-RA | P  | 0.001        | 941        | DIV | elongase                                                                       |
| AAEL012358-RA | P  | 0.000        | 8          | DIV | hypo. ptn                                                                      |
| AAEL012971-RB | P  | 0.000        | 1          | DIV | Mucin-2                                                                        |
| AAEL013248-RB | P  | 0.000        | 22         | DIV | Cyclin-H                                                                       |
| AAEL013376-RA | P  | 0.001        | 1112       | DIV | conserved hypo. ptn                                                            |
| AAEL013900-RA | P  | 0.001        | 2965       | DIV | cAMP&cAMP-inhib cgmp 35-cyclic phosphodiesterase                               |
| AAEL014287-RA | P  | 0.000        | 3          | DIV | Deoxycytidylate deaminase                                                      |
| AAEL015099-RI | P  | 0.000        | 27         | DIV | sumo ligase                                                                    |
| AAEL015336-RA | P  | 0.001        | 1058       | DIV | glutathione-S-transferase dom                                                  |
| AAEL015425-RA | P  | 0.000        | 42         | DIV | conserved hypo. ptn                                                            |
| AAEL015432-RA | P  | 0.000        | 35         | DIV | Serine protease easter                                                         |
| AAEL015621-RA | P  | 0.000        | 682        | DIV | dihydrodipicolinate synthase                                                   |
| AAEL015623-RA | P  | 0.000        | 2          | DIV | conserved hypo. ptn                                                            |
| AAEL015629-RA | P  | 0.001        | 1099       | DIV | xaa-pro aminopeptidase                                                         |
| AAEL017102-RA | P  | 0.001        | 358        | DIV | hypo. ptn                                                                      |
| AAEL017142-RA | P  | 0.000        | 51         | DIV | hypo. ptn                                                                      |
| AAEL017170-RA | P  | 0.000        | 1          | DIV | hypo. ptn                                                                      |
| AAEL003793-RA | PK | 0.001,0.001  | 1623, 1642 | DIV | hypo. ptn                                                                      |
| AAEL006057-RA | PK | 0.000,0.000  | 5,2        | DIV | heterogeneous nuclear ribonucleoptn                                            |
| AAEL007305-RA | PK | 0.001,0.001  | 1574, 1542 | DIV | conserved hypo. ptn                                                            |
| AAEL007427-RC | PK | 0.000,0.000  | 33, 122    | DIV | zinc finger ptn                                                                |
| AAEL008417-RA | PK | 0.001, 0.001 | 1205, 1124 | DIV | Coiled-coil dom-containing nascent polypep assoc complex (a subunit(nac alpha) |
| AAEL009651-RA | PK | 0.001, 0.001 | 644, 634   | DIV |                                                                                |
| AAEL011942-RA | PK | 0.001, 0.001 | 948, 771   | DIV | zinc finger ptn                                                                |
| AAEL014402-RA | PK | 0.000,0.000  | 4, 14      | DIV | grauzone                                                                       |
| AAEL015219-RA | PK | 0.001, 0.001 | 469, 535   | DIV | HD dom-containing ptn                                                          |
| AAEL015375-RA | PK | 0.000,0.000  | 711, 304   | DIV | serine/threonine ptn kinase                                                    |

|               |      |                         |                        |     |                                       |
|---------------|------|-------------------------|------------------------|-----|---------------------------------------|
| AAEL015487-RA | PK   | 0.001, 0.001            | 1083, 1085             | DIV | zinc finger Noc                       |
| AAEL004893-RA | PKM  | 0.000,0.000,0.000       | 3, 53, 14              | DIV | hypo. ptn                             |
| AAEL006965-RA | PKM  | 0.000,0.000,0.000       | 9, 38, 11              | DIV | hypo. ptn                             |
| AAEL008585-RA | PKM  | 0.001,0.001,0.001       | 2595, 2560, 2587       | DIV | kinase suppressor of ras (ksr)        |
| AAEL011673-RA | PKM  | 0.001,0.001,0.001       | 760, 1373, 1353        | DIV | cop9 signalosome complex subunit      |
| AAEL008073-RA | PKMT | 0.000,0.001,0.001,0.000 | 1445, 1408, 1466, 1380 | DIV | Hyaluronan/mRNA-binding ptn           |
| AAEL014638-RA | PKMT | 0.000,0.000,0.000,0.000 | 58, 36, 93, 56         | DIV | hypo. ptn                             |
| AAEL014847-RA | PKMT | 0.001,0.001,0.001,0.001 | 1148, 1177, 1152, 1113 | DIV | innexin                               |
| AAEL000493-RA | PKT  | 0.001,0.001,0.001       | 500, 458, 497          | DIV | heparan sulphate 6-o-sulfotransferase |
| AAEL003075-RA | PKT  | 0.001                   | 2757, 2750, 2678       | DIV | Zinc finger                           |
| AAEL008588-RA | PKT  | 0.001,0.001,0.001       | 1590, 1700, 1492       | DIV | innexin                               |
| AAEL008722-RA | PKT  | 0.001,0.001,0.001       | 3126, 3116, 3130       | DIV | zinc finger ptn                       |
| AAEL001910-RA | PM   | 0.000,0.000             | 53,8                   | DIV | zinc finger ptn 594                   |
| AAEL002664-RA | PM   | 0.001,0.000             | 83, 377                | DIV | hypo. ptn                             |
| AAEL002745-RA | PM   | 0.000,0.001             | 71, 289                | DIV | nucleoptn                             |
| AAEL002973-RA | PM   | 0.000,0.000             | 39,34                  | DIV | zinc finger ptn                       |
| AAEL003693-RA | PM   | 0.000,0.000             | 74,1                   | DIV | hypo. ptn                             |
| AAEL007300-RA | PM   | 0.000,0.000             | 45, 185                | DIV | syntaxin binding ptn-123              |
| AAEL012812-RA | PM   | 0.000,0.000             | 2, 14                  | DIV | exosome complex exonuclease RRP41     |
| AAEL002928-RA | PMT  | 0.001,0.001,0.001       | 999, 1021, 953         | DIV | zinc finger ptn                       |
| AAEL011393-RB | PMT  | 0.001,0.001,0.001       | 591, 530, 535          | DIV | unc-79                                |
| AAEL005723-RA | PT   | 0.001,0.001             | 1239, 1201             | DIV | conserved hypo. ptn                   |
| AAEL000042-RA | T    | 0.000                   | 3                      | DIV | DnaJ homolog subfamily C member       |
| AAEL000130-RA | T    | 0.001                   | 864                    | DIV | nucleoptn dom                         |
| AAEL001279-RA | T    | 0.001                   | 1779                   | DIV | merozoite surface ptn                 |
| AAEL001379-RA | T    | 0.001                   | 1638                   | DIV | Coiled-coil dom-containing            |
| AAEL002073-RA | T    | 0.000                   | 2                      | DIV | expressed ptn (FTZF1)                 |
| AAEL002303-RA | T    | 0.000                   | 1                      | DIV | ptn FRA10AC1                          |
| AAEL002722-RA | T    | 0.000                   | 7                      | DIV | ptn kinase C inhibitor                |
| AAEL003469-RA | T    | 0.000                   | 38                     | DIV | NHP2 ptn                              |
| AAEL004277-RA | T    | 0.001                   | 1750                   | DIV | Metallophosphoesterase dom            |
| AAEL004334-RA | T    | 0.000                   | 32                     | DIV | hypo. ptn                             |
| AAEL004667-RA | T    | 0.000                   | 14                     | DIV | conserved hypo. ptn                   |
| AAEL004872-RA | T    | 0.000                   | 23                     | DIV | Parkin coregulated gene               |
| AAEL005230-RA | T    | 0.000                   | 18                     | DIV | EF-hand dom-containing                |
| AAEL005287-RA | T    | 0.000                   | 27                     | DIV | hypo. ptn                             |

|               |   |       |      |     |                                                                             |
|---------------|---|-------|------|-----|-----------------------------------------------------------------------------|
| AAEL006067-RA | T | 0.001 | 916  | DIV | conserved hypo. ptn<br>ER mannosyl-oligosaccharide 12-alpha-<br>mannosidase |
| AAEL006074-RA | T | 0.001 | 2503 | DIV | mannosidase                                                                 |
| AAEL006344-RA | T | 0.000 | 4    | DIV | sulfotransferase (sult)                                                     |
| AAEL006545-RA | T | 0.001 | 510  | DIV | hypo. ptn                                                                   |
| AAEL007020-RA | T | 0.001 | 534  | DIV | hypo. ptn                                                                   |
| AAEL007161-RA | T | 0.001 | 755  | DIV | hypo. ptn                                                                   |
| AAEL007265-RA | T | 0.000 | 24   | DIV | hypo. ptn                                                                   |
| AAEL007427-RA | T | 0.001 | 1160 | DIV | zinc finger ptn                                                             |
| AAEL007433-RA | T | 0.000 | 98   | DIV | Transmembrane ptn                                                           |
| AAEL007852-RA | T | 0.000 | 7    | DIV | hypo. ptn                                                                   |
| AAEL008776-RA | T | 0.000 | 218  | DIV | Prostaglandin E synthase                                                    |
| AAEL009025-RA | T | 0.000 | 13   | DIV | heat shock ptn                                                              |
| AAEL009286-RA | T | 0.000 | 2    | DIV | hypo. ptn                                                                   |
| AAEL009643-RA | T | 0.000 | 20   | DIV | conserved hypo. ptn                                                         |
| AAEL010074-RA | T | 0.001 | 3968 | DIV | ptn suppressor of sable                                                     |
| AAEL010705-RA | T | 0.001 | 832  | DIV | hypo. ptn                                                                   |
| AAEL011667-RA | T | 0.000 | 985  | DIV | cir                                                                         |
| AAEL012006-RA | T | 0.000 | 60   | DIV | E3 ubiquitin-ptn ligase                                                     |
| AAEL012034-RA | T | 0.001 | 1377 | DIV | alpha-1 3-mannosyltransferase                                               |
| AAEL012166-RC | T | 0.000 | 4    | DIV | tamozhennic                                                                 |
| AAEL012178-RA | T | 0.001 | 2798 | DIV | wech                                                                        |
| AAEL012280-RA | T | 0.001 | 1100 | DIV | peflin ptn w/ long n-terminal hydrophobic dom                               |
| AAEL012352-RA | T | 0.001 | 1203 | DIV | Prohormone                                                                  |
| AAEL012598-RA | T | 0.000 | 8    | DIV | hypo. ptn                                                                   |
| AAEL013150-RA | T | 0.001 | 1435 | DIV | methionine aminopeptidase                                                   |
| AAEL013305-RA | T | 0.001 | 1467 | DIV | dihydrofolate reductase-thymidylate synthase                                |
| AAEL013408-RA | T | 0.000 | 333  | DIV | suppressin                                                                  |
| AAEL013465-RA | T | 0.000 | 29   | DIV | Inhibof Bruton tyrosine kinase                                              |
| AAEL013502-RA | T | 0.001 | 864  | DIV | ptn painting of fourth                                                      |
| AAEL013580-RA | T | 0.000 | 8    | DIV | conserved hypo. ptn                                                         |
| AAEL014510-RA | T | 0.001 | 2047 | DIV | sprouty                                                                     |
| AAEL014533-RA | T | 0.001 | 4828 | DIV | Inhibof Bruton tyrosine kinase                                              |
| AAEL014819-RA | T | 0.001 | 475  | DIV | Hotdog dom                                                                  |
| AAEL015045-RA | T | 0.000 | 4    | DIV | transcription factor IIIA                                                   |
| AAEL015353-RA | T | 0.001 | 450  | DIV | ninjurin a                                                                  |

|               |     |                   |               |       |                                                                              |
|---------------|-----|-------------------|---------------|-------|------------------------------------------------------------------------------|
| AAEL015444-RA | T   | 0.001             | 754           | DIV   | conserved hypo. ptn                                                          |
| AAEL017172-RA | T   | 0.000             | 12            | DIV   | Ribokinase-dom                                                               |
| AAEL017471-RA | T   | 0.000             | 2             | DIV   | hypo. ptn<br>Serine Protease Inhib(serpin)likely cleavage at                 |
| AAEL007765-RB | K   | 0.001             | 363           | IMM   | K/R                                                                          |
| AAEL015533-RA | M   | 0.001             | 1291          | IMM   | kallikrein                                                                   |
| AAEL013498-RA | PT  | 0.001, 0.001      | 1868, 1960    | IMM   | Prophenoloxidase subunit A3                                                  |
| AAEL014390-RA | T   | 0.001             | 103           | IMM   | galactose-specific C-type lectin                                             |
| AAEL015018-RA | T   | 0.001             | 512           | IMM   | toll                                                                         |
| AAEL001152-RA | K   | 0.001             | 1399          | MET   | beta-13-galactosyltransferase-6                                              |
| AAEL010540-RA | K   | 0.001             | 2099          | MET   | alpha-amylase                                                                |
| AAEL001364-RA | M   | 0.001             | 1398          | MET   | glucosyl/glucuronosyl transferases                                           |
| AAEL003079-RA | P   | 0.001             | 1723          | MET   | glucosyl/glucuronosyl transferases                                           |
| AAEL008451-RA | PK  | 0.001, 0.001      | 1503, 1500    | MET   | alpha-amylase                                                                |
| AAEL011511-RA | PKT | 0.001,0.000,0.001 | 396, 306, 312 | MET   | carnitine O-octanoyltransferase                                              |
| AAEL003076-RA | T   | 0.001             | 1854          | MET   | glucosyl/glucuronosyl transferases                                           |
| AAEL007323-RA | T   | 0.001             | 611           | MET   | deoxyuridine 5'-triphosphate nucleotidohydrolase                             |
| AAEL017833-RA | M   | 0.000             | 2             | miRNA | miR-92                                                                       |
| AAEL017925-RA | PK  | 0.000,0.000       | 2, 1          | miRNA | miR-190                                                                      |
| AAEL017593-RA | T   | 0.000             | 2             | miRNA | miRNA                                                                        |
| AAEL004067-RA | K   | 0.001             | 801           | MITO  | mitochondrial benzodiazepine receptor                                        |
| AAEL009590-RA | K   | 0.001             | 480           | MITO  | hypo. ptn                                                                    |
| AAEL004069-RA | M   | 0.000             | 621           | MITO  | mitochondrial 28S ribosomal ptn S14(s14mt)                                   |
| AAEL003946-RA | P   | 0.000             | 1             | MITO  | mitochondrial ribosomal ptn S33                                              |
| AAEL004433-RA | P   | 0.001             | 675           | MITO  | mitochondrial ribosomal ptn L14                                              |
| AAEL002993-RA | PKM | 0.001,0.000,0.000 | 680, 644, 780 | MITO  | 39S ribosomal ptn L43<br>mito inner membrane ptn translocase 8kD-<br>subunit |
| AAEL000941-RA | T   | 0.000             | 13            | MITO  | subunit                                                                      |
| AAEL009613-RA | T   | 0.001             | 542           | MITO  | mito ribosomal ptn L36                                                       |
| AAEL005860-RA | T   | 0.000             | 8             | MITO  | MIT ATP synthase subunit f                                                   |
| AAEL017711-RA | K   | 0.000             | 1             | ncRNA | U4 spliceosomal RNA                                                          |
| AAEL017609-RA | M   | 0.000             | 223           | ncRNA | U1 spliceosomal RNA                                                          |
| AAEL017832-RA | K   | 0.000             | 50            | ncRNA | Small nucleolar RNA snR54                                                    |
| AAEL017680-RA | K   | 0.000             | 81            | ncRNA | 5.8S rRNA                                                                    |
| AAEL017946-RA | K   | 0.000             | 6             | ncRNA | 5.8S rRNA                                                                    |
| AAEL017795-RA | KT  | 0.000,0.000       | 1, 1          | ncRNA | 5.8S rRNA                                                                    |



|               |      |                         |                    |       |                                              |
|---------------|------|-------------------------|--------------------|-------|----------------------------------------------|
| AAEL017756-RA | M    | 0.000                   | 3                  | ncRNA | 5.8S rRNA                                    |
| AAEL017789-RA | M    | 0.000                   | 30                 | ncRNA | 5.8S rRNA                                    |
| AAEL017867-RA | PK   | 0.001,0.000             | 71, 33             | ncRNA | 5.8S rRNA                                    |
| AAEL017594-RA | T    | 0.000                   | 55                 | ncRNA | 5.8S rRNA                                    |
| AAEL017683-RA | K    | 0.001                   | 141                | ncRNA | 5.8S rRNA                                    |
| AAEL017745-RA | K    | 0.000                   | 71                 | ncRNA | 28S rRNA                                     |
| AAEL017856-RA | K    | 0.000                   | 37                 | ncRNA | 28S rRNA                                     |
| AAEL017735-RA | KM   | 0.000,0.001             | 163, 528           | ncRNA | 28S rRNA                                     |
| AAEL017622-RA | M    | 0.000                   | 25                 | ncRNA | 28S rRNA                                     |
| AAEL017786-RA | M    | 0.001                   | 511                | ncRNA | 28S rRNA                                     |
| AAEL017585-RA | P    | 0.001                   | 191                | ncRNA | 28S rRNA                                     |
| AAEL017618-RA | PKMT | 0.001,0.000,0.000,0.001 | 105, 236, 112, 227 | ncRNA | 28S rRNA                                     |
| AAEL017918-RA | PM   | 0.000,0.000             | 1, 300             | ncRNA | 28S rRNA                                     |
| AAEL017700-RA | T    | 0.000                   | 28                 | ncRNA | 28S rRNA                                     |
| AAEL017909-RA | T    | 0.001                   | 346                | ncRNA | 28S rRNA                                     |
| AAEL017752-RA | K    | 0.000                   | 66                 | ncRNA | 18s rRNA                                     |
| AAEL017953-RA | M    | 0.001                   | 174                | ncRNA | 18s rRNA                                     |
| AAEL017614-RA | P    | 0.001                   | 234                | ncRNA | 18s rRNA                                     |
| AAEL017915-RA | P    | 0.001                   | 484                | ncRNA | 18s rRNA                                     |
| AAEL017944-RA | P    | 0.001                   | 509                | ncRNA | 18s rRNA                                     |
| AAEL017780-RA | PK   | 0.000,0.001             | 179, 139           | ncRNA | 18s rRNA                                     |
| AAEL017686-RA | PMT  | 0.000,0.000,0.000       | 97, 97, 97         | ncRNA | 18s rRNA                                     |
| AAEL017782-RA | T    | 0.000                   | 61                 | ncRNA | 18s rRNA                                     |
| AAEL000002-RA | K    | 0.000                   | 54                 | PROT  | hypo. ptn                                    |
| AAEL002121-RA | K    | 0.001                   | 857                | PROT  | 26S proteasome complex subunit               |
| AAEL004173-RA | K    | 0.001                   | 1550               | PROT  | 26S proteasome non-ATPase regulatory subunit |
| AAEL008600-RA | K    | 0.001                   | 1497               | PROT  | zinc carboxypeptidase                        |
| AAEL003921-RA | KM   | 0.000,0.000             | 11,8               | PROT  | anopheles stephensi ubiquitin                |
| AAEL006414-RA | M    | 0.001                   | 876                | PROT  | trypsin                                      |
| AAEL014642-RA | MT   | 0.001, 0.001            | 526, 499           | PROT  | ubiquitin conjugating enzyme                 |
| AAEL009689-RA | P    | 0.001                   | 1162               | PROT  | serine protease                              |
| AAEL013890-RA | P    | 0.000                   | 41                 | PROT  | 26S proteasome non-ATPase regulatory subunit |
| AAEL017574-RA | P    | 0.001                   | 307                | PROT  | Trypsin-1                                    |
| AAEL006902-RA | PK   | 0.000,0.000             | 4, 6               | PROT  | serine-type endopeptidase                    |
| AAEL002273-RA | T    | 0.000                   | 6                  | PROT  | trypsin                                      |
| AAEL006960-RA | T    | 0.001                   | 2122               | PROT  | calpain                                      |

|               |     |                   |                  |       |                                             |
|---------------|-----|-------------------|------------------|-------|---------------------------------------------|
| AAEL008781-RA | T   | 0.000             | 83               | PROT  | serine-type endopeptidase                   |
| AAEL014568-RA | T   | 0.000             | 8                | PROT  | Peptidase S1 dom                            |
| AAEL002835-RA | K   | 0.001             | 2727             | ReDox | Oxidative stress-induced                    |
| AAEL010075-RA | K   | 0.001             | 1049             | ReDox | oxidoreductase                              |
| AAEL010146-RA | K   | 0.001             | 1522             | ReDox | 3-hydroxyacyl-coa dehydrogenase             |
| AAEL011158-RB | K   | 0.001             | 982              | ReDox | disulfide oxidoreductase                    |
| AAEL015628-RA | KM  | 0.000, 0.001      | 1310, 865        | ReDox | glycine dehydrogenase                       |
| AAEL014208-RA | KMT | 0.001,0.001,0.001 | 2004, 2028, 1997 | ReDox | cytochrome P450 CYP307B1                    |
| AAEL003011-RA | M   | 0.001             | 294              | ReDox | NADH dehydrogenase                          |
| AAEL006081-RA | M   | 0.000             | 1                | ReDox | NADPH fad oxidoreductase                    |
| AAEL014684-RA | M   | 0.000             | 16               | ReDox | CYP6F3                                      |
| AAEL017165-RA | M   | 0.001             | 2003             | ReDox | Cytochrome P450 4V3                         |
| AAEL015002-RA | MT  | 0.000,0.000       | 9, 10            | ReDox | aldo-keto reductase                         |
| AAEL007385-RB | P   | 0.000             | 26               | ReDox | ferritin subunit 1                          |
| AAEL009685-RA | P   | 0.001             | 1253             | ReDox | oxidoreductase                              |
| AAEL012614-RA | P   | 0.000             | 77               | ReDox | NADP-specific isocitrate dehydrogenase      |
| AAEL015625-RA | P   | 0.000             | 260              | ReDox | NAD+ dep glycerol-3-phosphate dehydrogenase |
| AAEL015630-RA | P   | 0.000             | 957              | ReDox | pyrroline-5-carboxylate dehydrogenase       |
| AAEL008072-RA | PT  | 0.001,0.001       | 767, 773         | ReDox | NADH-plastoquinone oxidoreductase           |
| AAEL005796-RB | K   | 0.000             | 37               | R/T/T | eukaryotic translation initiation factor 4e |
| AAEL013761-RB | K   | 0.000             | 42               | R/T/T | ADP-ribosylation factor arf                 |
| AAEL014498-RA | K   | 0.001             | 814              | R/T/T | Exosome complex exonuclease                 |
| AAEL017030-RA | KM  | 0.001, 0.001      | 798, 758         | R/T/T | RNA-binding ptn Rsf1                        |
| AAEL000513-RA | KMT | 0.000,0.000,0.001 | 133, 95, 133     | R/T/T | histone H4                                  |
| AAEL015449-RA | KMT | 0.001,0.001,0.001 | 276, 358, 98     | R/T/T | ribosome biogenesis ptn brix                |
| AAEL003851-RA | KT  | 0.001,0.000       | 80,69            | R/T/T | histone H2A                                 |
| AAEL003866-RA | KT  | 0.000,0.001       | 17,71            | R/T/T | histone H4                                  |
| AAEL003382-RA | M   | 0.000             | 10               | R/T/T | Ro ribonucleoptn autoantigen                |
| AAEL005245-RA | M   | 0.001             | 3742             | R/T/T | DNA repair ptn rad50                        |
| AAEL010025-RA | M   | 0.001             | 973              | R/T/T | SAGA-associated factor                      |
| AAEL014423-RA | M   | 0.001             | 2167             | R/T/T | Mitotic spindle assembly checkpoint ptnMAD1 |
| AAEL014831-RA | M   | 0.001             | 506              | R/T/T | RNA polymerase II subunit Rpb10             |
| AAEL015645-RA | M   | 0.001             | 870              | R/T/T | RNA binding motif ptn                       |
| AAEL015677-RA | M   | 0.000             | 128              | R/T/T | histone H2B                                 |
| AAEL000432-RA | P   | 0.001             | 1110             | R/T/T | nucleosome assembly ptn                     |
| AAEL002435-RD | P   | 0.000             | 28               | R/T/T | Broad-complex core ptn isoform 6            |

|               |     |                   |               |        |                                         |
|---------------|-----|-------------------|---------------|--------|-----------------------------------------|
| AAEL012171-RA | P   | 0.001             | 2409          | R/T/T  | RNA recognition motif ptn split ends    |
| AAEL015626-RA | P   | 0.001             | 254           | R/T/T  | Ribosomal ptn L11 methyltransferase     |
| AAEL015060-RA | PK  | 0.001, 0.001      | 1122, 1095    | R/T/T  | Rad51A ptn                              |
| AAEL009071-RA | PKM | 0.001,0.001,0.001 | 305, 659, 413 | R/T/T  | 60S ribosomal ptn L7                    |
| AAEL008637-RA | PKT | 0.001,0.001,0.001 | 918, 934, 819 | R/T/T  | cdk5                                    |
| AAEL005196-RA | PM  | 0.001,0.001       | 812, 863      | R/T/T  | PDZ dom                                 |
| AAEL006141-RA | PM  | 0.001,0.001       | 509, 659      | R/T/T  | 40S ribosomal ptn S3a                   |
| AAEL015006-RA | PMT | 0.000,0.000,0.000 | 163, 194, 300 | R/T/T  | 60S ribosomal ptn L23                   |
| AAEL010218-RA | PT  | 0.000,0.000       | 25, 28        | R/T/T  | GATA transcription factor (GATAa)       |
| AAEL010180-RA | T   | 0.001             | 1071          | R/T/T  | conserved hypo. ptn                     |
| AAEL010463-RA | T   | 0.001             | 595           | R/T/T  | Homeobox ptn rough                      |
| AAEL011999-RA | T   | 0.001             | 448           | R/T/T  | histone H4                              |
| AAEL014748-RA | T   | 0.001             | 3363          | R/T/T  | DNA repair ptn rad50                    |
| AAEL007766-RA | K   | 0.001             | 839           | SigT   | ras GTPase                              |
| AAEL003378-RA | M   | 0.001             | 1575          | SigT   | GPCR Orphan/ Class A Family             |
| AAEL015236-RA | M   | 0.001             | 445           | SigT   | signal recognition particle 9kD-subunit |
| AAEL011970-RA | P   | 0.001             | 749           | SigT   | GPCR Purine/Adenosine Family            |
| AAEL015250-RA | P   | 0.001             | 676           | SigT   | AmphiWnt7b                              |
| AAEL011621-RA | PT  | 0.000,0.000       | 53, 34        | SigT   | C-Type Lectin (CTL) -mannose binding    |
| AAEL013645-RA | T   | 0.001             | 1179          | SigT   | FMRFamide-dom                           |
| AAEL017126-RA | T   | 0.001             | 258           | SigT   | hypo. ptn                               |
| AAEL002105-RA | K   | 0.001             | 1092          | SPLICE | conserved hypo. ptn                     |
| AAEL008228-RA | MT  | 0.001, 0.001      | 608, 614      | SPLICE | small nuclear ribonucleoptn             |
| AAEL016080-RA | K   | 0.000             | 3             | tRNA   | Pseudogene Ala(AGC antisense)           |
| AAEL016122-RA | K   | 0.000             | 7             | tRNA   | Arg (TCT antisense)                     |
| AAEL016266-RA | K   | 0.000             | 11            | tRNA   | Ala pseudogene                          |
| AAEL016313-RA | K   | 0.000             | 8             | tRNA   | Glu(TTC antisense)                      |
| AAEL016542-RA | K   | 0.000             | 3             | tRNA   | Phe(GAA antisense)                      |
| AAEL016703-RA | K   | 0.000             | 1             | tRNA   | Gln(CTG antisense)                      |
| AAEL016709-RA | K   | 0.000             | 5             | tRNA   | Ala(AGC antisense)                      |
| AAEL016784-RA | K   | 0.000             | 5             | tRNA   | Ala(AGC antisense)                      |
| AAEL016897-RA | K   | 0.000             | 4             | tRNA   | Pseudogene Ala(AGC antisense)           |
| AAEL016918-RA | K   | 0.000             | 5             | tRNA   | Thr(TGT antisense)                      |
| AAEL016935-RA | K   | 0.000             | 1             | tRNA   | Asp(GTC antisense)                      |
| AAEL016940-RA | K   | 0.000             | 12            | tRNA   | Asp(GTC antisense)                      |
| AAEL016065-RA | M   | 0.000             | 9             | tRNA   | Ser(CGA antisense)                      |

|               |     |                   |               |      |                                                                                     |
|---------------|-----|-------------------|---------------|------|-------------------------------------------------------------------------------------|
| AAEL016121-RA | M   | 0.000             | 10            | tRNA | Glu(CTC antisense)                                                                  |
| AAEL016632-RA | M   | 0.000             | 3             | tRNA | His(GTG antisense)                                                                  |
| AAEL016943-RA | M   | 0.000             | 5             | tRNA | Pro(AGG antisense)                                                                  |
| AAEL016094-RA | P   | 0.000             | 2             | tRNA | Pseudogene Ala(AGC antisense)                                                       |
| AAEL016907-RA | P   | 0.000             | 1             | tRNA | Pseudogene Ala(AGC antisense)                                                       |
| AAEL016906-RA | PMT | 0.000,0.000,0.000 | 1, 1, 1       | tRNA | Glu pseudogene                                                                      |
| AAEL016022-RA | T   | 0.000             | 9             | tRNA | Lys(CTT antisense)                                                                  |
| AAEL016089-RA | T   | 0.000             | 19            | tRNA | Ala pseudogene                                                                      |
| AAEL016115-RA | T   | 0.000             | 44            | tRNA | Lys(CTT antisense)                                                                  |
| AAEL006019-RD | K   | 0.000             | 10            | TRP  | voltage-gated sodium channel<br>calcium-transporting ATPase sarcoplasmic/ER<br>type |
| AAEL006582-RB | K   | 0.001             | 84            | TRP  | importin alpha                                                                      |
| AAEL012960-RA | K   | 0.001             | 2354          | TRP  | microtubule-associated ptn tau                                                      |
| AAEL015538-RA | K   | 0.001             | 928           | TRP  | vitellogenin receptor (VgR)                                                         |
| AAEL014223-RA | KM  | 0.000,0.000       | 87, 118       | TRP  | regulating synaptic membrane exocytosis ptn                                         |
| AAEL000524-RA | KT  | 0.001,0.001       | 309, 315      | TRP  | hypo. ptn<br>Calcium-transporting ATPase sarcoplasmic/ER<br>type                    |
| AAEL008470-RA | M   | 0.001             | 477           | TRP  | Acetylcholine receptor subunit beta-like 2                                          |
| AAEL017576-RA | M   | 0.001             | 911           | TRP  | plexin b                                                                            |
| AAEL004019-RA | MT  | 0.001,0.001       | 721, 731      | TRP  | glucose transporter                                                                 |
| AAEL011432-RA | P   | 0.001             | 4085          | TRP  | mfs transporter                                                                     |
| AAEL012478-RA | PK  | 0.001, 0.001      | 1302, 1296    | TRP  | ADP ATP carrier ptn                                                                 |
| AAEL013146-RA | PK  | 0.000,0.001       | 188, 174      | TRP  | dynamain                                                                            |
| AAEL012198-RA | PMT | 0.001,0.001,0.001 | 917, 814, 870 | TRP  | Transmembrane ptn                                                                   |
| AAEL007288-RB | PT  | 0.001,0.001       | 366, 321      | TRP  | tropomyosin invertebrate                                                            |
| AAEL000930-RC | T   | 0.001             | 314           | TRP  | Exportin-7                                                                          |
| AAEL002761-RG | T   | 0.000             | 22            | TRP  | glutamate receptor 7 (ampa)                                                         |
| AAEL009636-RA | T   | 0.000             | 6             | TRP  | hypo. ptn                                                                           |
| AAEL009813-RA | T   | 0.001             | 3443          | TRP  | UDP-sugar transporter UST74c (fringe<br>connection ptn)                             |
| AAEL013033-RA | T   | 0.001             | 374           | TRP  | conserved hypo. ptn                                                                 |
| AAEL014643-RA | T   | 0.001             | 645           | TRP  | hypo. ptn                                                                           |
| AAEL000211-RA | K   | 0.001             | 596           | UNK  | Lebercilin-like                                                                     |
| AAEL000841-RA | K   | 0.000             | 42            | UNK  | Ninjurin dom                                                                        |
| AAEL003557-RA | K   | 0.001             | 895           | UNK  | hypo. ptn                                                                           |
| AAEL004665-RA | K   | 0.000             | 379           | UNK  |                                                                                     |
| AAEL008414-RA | K   | 0.001             | 4186          | UNK  |                                                                                     |

|               |     |                   |               |     |                                    |
|---------------|-----|-------------------|---------------|-----|------------------------------------|
| AAEL009433-RA | K   | 0.001             | 645           | UNK | conserved hypo. ptn                |
| AAEL013618-RA | K   | 0.001             | 2130          | UNK | conserved hypo. ptn                |
| AAEL013857-RA | K   | 0.001             | 125           | UNK | hypo. ptn                          |
| AAEL013946-RA | K   | 0.001             | 781           | UNK | hypo. ptn                          |
| AAEL000183-RA | KM  | 0.001, 0.001      | 325, 470      | UNK | hypo. ptn                          |
| AAEL003016-RA | KM  | 0.001,0.001       | 1994, 2087    | UNK | hypo. ptn                          |
| AAEL010400-RA | KM  | 0.000,0.000       | 753, 800      | UNK | hypo. ptn                          |
| AAEL015121-RA | KMT | 0.001,0.001,0.000 | 470, 455, 453 | UNK | hypo. ptn                          |
| AAEL017057-RA | KMT | 0.000,0.001,0.001 | 668, 663, 668 | UNK | hypo. ptn                          |
| AAEL017759-RA | KMT | 0.001,0.000,0.000 | 141, 56, 8    | UNK | unknown                            |
| AAEL017047-RA | KT  | 0.001, 0.001      | 331, 314      | UNK | hypo. ptn                          |
| AAEL001259-RA | M   | 0.000             | 306           | UNK | hypo. ptn                          |
| AAEL003007-RA | M   | 0.001             | 634           | UNK | hypo. ptn                          |
| AAEL006134-RA | M   | 0.000             | 488           | UNK | Coiled-coil dom                    |
| AAEL006275-RA | M   | 0.001             | 1173          | UNK | conserved hypo. ptn                |
| AAEL007086-RA | M   | 0.001             | 425           | UNK | hypo. ptn                          |
| AAEL007321-RA | M   | 0.001             | 1073          | UNK | LysM and peptidoglycan-binding dom |
| AAEL007703-RA | M   | 0.000             | 8             | UNK | conserved hypo. ptn                |
| AAEL008778-RA | M   | 0.001             | 1130          | UNK | conserved hypo. ptn                |
| AAEL011286-RA | M   | 0.000             | 30            | UNK | conserved hypo. ptn                |
| AAEL012038-RA | M   | 0.001             | 2086          | UNK | hypo. ptn                          |
| AAEL013167-RA | M   | 0.000             | 255           | UNK | conserved hypo. ptn                |
| AAEL017108-RA | M   | 0.001             | 332           | UNK | hypo. ptn                          |
| AAEL017274-RA | M   | 0.001             | 346           | UNK | hypo. ptn                          |
| AAEL017550-RA | M   | 0.001             | 339           | UNK | hypo. ptn                          |
| AAEL004591-RB | MT  | 0.000,0.000       | 8, 59         | UNK | hypo. ptn                          |
| AAEL008066-RA | MT  | 0.001,0.001       | 622, 625      | UNK | hypo. ptn                          |
| AAEL016994-RA | MT  | 0.000, 0.001      | 478, 384      | UNK | hypo. ptn                          |
| AAEL018158-RA | MT  | 0.001, 0.001      | 942, 879      | UNK | Zinc finger                        |
| AAEL003760-RA | P   | 0.001             | 755           | UNK | conserved hypo. ptn                |
| AAEL005193-RA | P   | 0.001             | 823           | UNK | hypo. ptn                          |
| AAEL008065-RA | P   | 0.001             | 1032          | UNK | Myosin light chain kinase-like     |
| AAEL009315-RA | P   | 0.001             | 458           | UNK | hypo. ptn                          |
| AAEL009827-RA | P   | 0.001             | 891           | UNK | hypo. ptn                          |
| AAEL013865-RA | P   | 0.001             | 461           | UNK | conserved hypo. ptn                |
| AAEL014661-RA | P   | 0.001             | 429           | UNK | hypo. ptn                          |

|               |      |                         |                       |     |                                          |
|---------------|------|-------------------------|-----------------------|-----|------------------------------------------|
| AAEL015376-RA | P    | 0.001                   | 345                   | UNK | hypo. ptn                                |
| AAEL017024-RA | P    | 0.001                   | 219                   | UNK | hypo. ptn                                |
| AAEL017791-RA | P    | 0.000                   | 8                     | UNK | unknown                                  |
| AAEL017853-RA | P    | 0.001                   | 151                   | UNK | unknown                                  |
| AAEL018303-RA | P    | 0.001                   | 936                   | UNK | Lebercilin-like                          |
| AAEL001753-RA | PK   | 0.001,0.001             | 758, 585              | UNK | hypo. ptn                                |
| AAEL004446-RA | PK   | 0.001,0.001             | 1568, 1554            | UNK | hypo. ptn                                |
| AAEL005713-RA | PK   | 0.001,0.001             | 670, 674              | UNK | Cyclin-dependent kinase 2-associated ptn |
| AAEL009821-RA | PK   | 0.001, 0.001            | 3051, 3067            | UNK | hypo. ptn                                |
| AAEL013298-RA | PK   | 0.001,0.000             | 795, 516              | UNK | serine protease                          |
| AAEL015473-RA | PK   | 0.001,0.000             | 304, 212              | UNK | zinc finger                              |
| AAEL017894-RA | PK   | 0.001,0.000             | 158, 180              | UNK | unknown                                  |
| AAEL007163-RA | PKMT | 0.000,0.001,0.000,0.001 | 1465, 1494, 1409,1446 | UNK | hypo. ptn                                |
| AAEL015521-RA | PKT  | 0.001,0.000,0.000       | 385, 353, 390         | UNK | Phosphofurin acidic cluster sorting-dom  |
| AAEL017176-RA | PKT  | 0.001,0.001,0.001       | 336, 317, 330         | UNK | hypo. ptn                                |
| AAEL015537-RA | PM   | 0.001, 0.001            | 649, 421              | UNK | BTB-POZ-like                             |
| AAEL017413-RA | PM   | 0.001, 0.001            | 393, 419              | UNK | hypo. ptn                                |
| AAEL017551-RA | PMT  | 0.001,0.001,0.001       | 241, 245, 146         | UNK | hypo. ptn                                |
| AAEL014442-RA | PT   | 0.001, 0.001            | 596, 525              | UNK | hypo. ptn                                |
| AAEL001773-RA | T    | 0.000                   | 120                   | UNK | conserved hypo. ptn                      |
| AAEL004123-RA | T    | 0.001                   | 690                   | UNK | hypo. ptn                                |
| AAEL004937-RA | T    | 0.001                   | 684                   | UNK | hypo. ptn                                |
| AAEL005503-RA | T    | 0.001                   | 925                   | UNK | Actin cytoskeleton-regulatory dom        |
| AAEL006238-RA | T    | 0.001                   | 394                   | UNK | conserved hypo. ptn                      |
| AAEL007053-RB | T    | 0.001                   | 199                   | UNK | hypo. ptn                                |
| AAEL007620-RA | T    | 0.000                   | 117                   | UNK | hypo. ptn                                |
| AAEL009683-RA | T    | 0.001                   | 483                   | UNK | hypo. ptn                                |
| AAEL011397-RA | T    | 0.001                   | 1146                  | UNK | hypo. ptn                                |
| AAEL013011-RA | T    | 0.001                   | 389                   | UNK | hypo. ptn                                |
| AAEL013646-RA | T    | 0.001                   | 862                   | UNK | conserved hypo. ptn                      |
| AAEL017485-RA | T    | 0.001                   | 336                   | UNK | hypo. ptn                                |
| AAEL017540-RA | T    | 0.000                   | 159                   | UNK | hypo. ptn                                |

\* Functional classes: 'CSR', chemosensory reception; 'CYT/STR', cytoskeletal and structural; 'DIV', diverse functions; 'IMM', immunity-and apoptosis-related; 'MET', metabolism; 'miRNA' microRNA; 'MITO', mitochondrial; 'ncRNA' non-coding RNA; 'PROT', proteolysis or 26S proteasome function; 'R/T/T', replication, transcription, and translation; 'ReDox', reduction/oxidation and oxidoreductive stress; 'SigT', Signal

Transduction; 'SPLICE', RNA processing or pre-processing and splicing activity or regulation; 'TRP', transport or signaling; 'UNK', unknown functions.
