# Supplementary material for: Exon-Enriched Libraries Reveal Large Genic Differences Between Aedes aegypti from Senegal, West Africa, and Populations Outside Africa
Source: Oxford University Press journal article supplement (doi:10.1534/g3.116.036053), 2017-02-01
Supplement: 036053_tables2.pdf [file 036053_tables2.pdf]

Table S2. Genes in the upper 1% of H<sub>exp</sub> values.

| VectorBase ID | Collection | Hexp                   | No. SNPs            | Function* | Description                                          |
|---------------|------------|------------------------|---------------------|-----------|------------------------------------------------------|
| AAEL009800-RA | P          | 0.061                  | 512                 | CYT/STR   | cuticle prot                                         |
| AAEL000029-RA | T          | 0.048                  | 2083                | DIV       | dopachrome-conversion enzyme (DCE)                   |
| AAEL000076-RA | K          | 0.196                  | 2                   | DIV       | dimethyladenosine transferase                        |
| AAEL000475-RB | KT         | 0.073,0.082            | 179,68              | DIV       | Beta-catenin-like                                    |
| AAEL000560-RA | M          | 0.067                  | 38                  | DIV       | hypo prot                                            |
| AAEL000810-RA | KMT        | 0.069,0.05,0.049       | 10611,8578,7884     | DIV       | prot kinase c                                        |
| AAEL001838-RA | P          | 0.058                  | 66                  | DIV       | Prefoldin subunit                                    |
| AAEL002264-RA | KT         | 0.086,0.074            | 147,32              | DIV       | conserved hypo prot                                  |
| AAEL004011-RA | M          | 0.051                  | 9                   | DIV       | hypo prot                                            |
| AAEL004164-RA | K          | 0.111                  | 437                 | DIV       | conserved hypo prot                                  |
| AAEL004351-RB | K          | 0.103                  | 118                 | DIV       | casein kinase                                        |
| AAEL004351-RC | K          | 0.09                   | 95                  | DIV       | casein kinase                                        |
| AAEL004372-RA | PKMT       | 0.127,0.16,0.126,0.057 | 1044,1188,1118,1020 | DIV       | Lipid storage droplets surface-binding               |
| AAEL004689-RB | PK         | 0.091,0.083            | 51,68               | DIV       | RING finger domain                                   |
| AAEL004872-RA | M          | 0.132                  | 61                  | DIV       | Parkin coregulated                                   |
| AAEL004985-RA | K          | 0.113                  | 58                  | DIV       | house keepingprot                                    |
| AAEL005073-RA | M          | 0.051                  | 3292                | DIV       | Golgin subfamily A member 6-like                     |
| AAEL005551-RA | PKMT       | 0.102,0.096,0.064,0.09 | 1137,1204,1281,1132 | DIV       | Trichohyalin                                         |
| AAEL005756-RC | T          | 0.069                  | 67                  | DIV       | Rhodanese-like domain                                |
| AAEL005877-RC | K          | 0.081                  | 16                  | DIV       | Activator of 90 kDa heat shock prot ATPase homolog   |
| AAEL005977-RA | KM         | 0.069,0.08             | 833,241             | DIV       | chondroitin 4-sulfotransferase                       |
| AAEL006341-RA | PK         | 0.064,0.082            | 72,588              | DIV       | conserved hypo prot                                  |
| AAEL006353-RA | K          | 0.081                  | 58                  | DIV       | sulfotransferase (sult)                              |
| AAEL006445-RA | T          | 0.048                  | 1545                | DIV       | GPI-anchored wall transfer prot 1                    |
| AAEL006575-RC | P          | 0.063                  | 8                   | DIV       | troponin C                                           |
| AAEL006600-RC | T          | 0.054                  | 241                 | DIV       | juvenile hormone-inducible prot                      |
| AAEL006632-RB | KM         | 0.078,0.08             | 67,34               | DIV       | Receptor expression-enhancing prot                   |
| AAEL006820-RA | PKMT       | 0.069,0.085,0.059,0.06 | 1577,1618,1570,1553 | DIV       | lipid storage droplets surface binding prot 2 (lsd2) |
| AAEL006996-RA | M          | 0.088                  | 59                  | DIV       | conserved hypo prot                                  |
| AAEL007294-RA | T          | 0.046                  | 2477                | DIV       | Dromyosuppressin                                     |
| AAEL007614-RA | T          | 0.12                   | 4                   | DIV       | conserved hypo prot                                  |
| AAEL007820-RB | K          | 0.086                  | 156                 | DIV       | LSM12 homolog A                                      |
| AAEL007953-RA | T          | 0.076                  | 559                 | DIV       | SPRY domain                                          |

|               |      |                         |                     |     |                                                            |
|---------------|------|-------------------------|---------------------|-----|------------------------------------------------------------|
| AAEL008012-RA | PKT  | 0.114,0.109,0.124       | 59,132,1            | DIV | hypo prot                                                  |
| AAEL008058-RB | K    | 0.107                   | 18                  | DIV | liprin a (lar-interacting prot a synapse defective prot 2) |
| AAEL008092-RA | K    | 0.072                   | 157                 | DIV | hypo prot                                                  |
| AAEL008114-RA | PK   | 0.071,0.093             | 981,998             | DIV | p15-2b prot                                                |
| AAEL008200-RA | P    | 0.065                   | 155                 | DIV | conserved hypo prot                                        |
| AAEL008532-RA | T    | 0.066                   | 22                  | DIV | NULL                                                       |
| AAEL008556-RB | PKMT | 0.117,0.105,0.088,0.093 | 83,120,88,78        | DIV | prp4                                                       |
| AAEL008900-RA | T    | 0.046                   | 214                 | DIV | p15-2a prot                                                |
| AAEL009052-RA | PKM  | 0.079,0.095,0.158       | 100,229,19          | DIV | conserved hypo prot                                        |
| AAEL009212-RE | K    | 0.07                    | 12                  | DIV | lola                                                       |
| AAEL009219-RA | P    | 0.058                   | 4630                | DIV | predicted prot                                             |
| AAEL009997-RA | PMT  | 0.065,0.056,0.061       | 969,933,952         | DIV | hypo prot                                                  |
| AAEL010170-RB | K    | 0.092                   | 106                 | DIV | ras-related prot Rab-8A                                    |
| AAEL010172-RA | PKM  | 0.076,0.088,0.081       | 145,221,64          | DIV | Leucokinins                                                |
| AAEL010194-RA | PK   | 0.058,0.085             | 105,65              | DIV | hypo prot                                                  |
| AAEL010281-RA | MT   | 0.075,0.06              | 102,120             | DIV | Zinc finger                                                |
| AAEL010576-RE | K    | 0.097                   | 12                  | DIV | modifier of mdg4                                           |
| AAEL010897-RA | MT   | 0.052,0.053             | 1391,1111           | DIV | SH3 domain-containing                                      |
| AAEL011083-RB | PKMT | 0.105,0.1,0.055,0.112   | 164,219,48,107      | DIV | NULL                                                       |
| AAEL011098-RA | PKMT | 0.078,0.086,0.061,0.054 | 2907,3073,2830,2620 | DIV | Nucleoside diphosphate kinase                              |
| AAEL011208-RA | PMT  | 0.067,0.064,0.055       | 1358,1590,1305      | DIV | Av71 muscle cell intermediate filament                     |
| AAEL011414-RC | PT   | 0.058,0.046             | 119,5               | DIV | high mobility group non-histone prot                       |
| AAEL012119-RA | PKMT | 0.096,0.072,0.096,0.099 | 609,1285,309,257    | DIV | Nucleolin                                                  |
| AAEL012231-RA | K    | 0.145                   | 71                  | DIV | hypo prot                                                  |
| AAEL012576-RA | K    | 0.07                    | 55                  | DIV | pyruvate kinase                                            |
| AAEL012612-RB | K    | 0.127                   | 36                  | DIV | serine/threonine prot kinase                               |
| AAEL012887-RA | MT   | 0.086,0.077             | 47,3                | DIV | conserved hypo prot                                        |
| AAEL012971-RA | PKMT | 0.079,0.068,0.051,0.057 | 325,427,378,350     | DIV | Mucin-2                                                    |
| AAEL012971-RB | K    | 0.082                   | 22                  | DIV | Mucin-2                                                    |
| AAEL013038-RA | M    | 0.058                   | 1571                | DIV | Diacylglycerol kinase                                      |
| AAEL013203-RB | PK   | 0.139,0.102             | 5,127               | DIV | Ubiquitin carboxyl-terminal hydrolase                      |
| AAEL013464-RA | T    | 0.059                   | 208                 | DIV | WD repeat-containing                                       |
| AAEL013574-RB | PK   | 0.071,0.072             | 145,190             | DIV | apolipoprot D                                              |
| AAEL013681-RA | M    | 0.063                   | 19                  | DIV | hypo prot                                                  |
| AAEL013877-RG | PKMT | 0.06,0.069,0.059,0.051  | 1115,1604,598,366   | DIV | glucosamine-6-phosphate isomerase                          |
| AAEL014039-RA | K    | 0.072                   | 74                  | DIV | conserved hypo prot                                        |

|               |      |                         |                     |       |                                                          |
|---------------|------|-------------------------|---------------------|-------|----------------------------------------------------------|
| AAEL014668-RA | PKMT | 0.086,0.091,0.08,0.083  | 3397,3409,3092,3211 | DIV   | ankyrin 23/unc44                                         |
| AAEL014741-RA | PKM  | 0.082,0.094,0.061       | 1915,1736,1358      | DIV   | serine/threonine-prot kinase ripk4                       |
| AAEL014742-RA | PKMT | 0.135,0.139,0.067,0.061 | 3063,2875,2562,2721 | DIV   | ankyrin 23/unc44                                         |
| AAEL014956-RA | MT   | 0.051,0.053             | 1983,1924           | DIV   | internalin A                                             |
| AAEL015143-RA | P    | 0.074                   | 37                  | DIV   | glycine rich RNA binding prot                            |
| AAEL015454-RA | M    | 0.075                   | 82                  | DIV   | conserved hypo prot                                      |
| AAEL017027-RA | T    | 0.076                   | 6                   | DIV   | hypo prot                                                |
| AAEL017039-RA | T    | 0.128                   | 26                  | DIV   | Alcohol dehydrogenase                                    |
| AAEL017112-RA | T    | 0.053                   | 65                  | DIV   | hypo prot                                                |
| AAEL017469-RA | MT   | 0.074,0.052             | 64,16               | DIV   | hypo prot                                                |
| AAEL017506-RA | PKMT | 0.073,0.077,0.124,0.06  | 172,251,20,61       | DIV   | hypo prot                                                |
| AAEL003139-RB | M    | 0.057                   | 116                 | FAT   | short-chain dehydrogenase                                |
| AAEL009231-RA | PT   | 0.059,0.051             | 1268,1244           | FAT   | Lipid storage droplet-1                                  |
| AAEL006212-RA | T    | 0.047                   | 2116                | IMM   | toll-like receptor                                       |
| AAEL014141-RB | PKMT | 0.08,0.069,0.085,0.084  | 124,131,116,82      | IMM   | Serine Protease Inhibitor (serpin)likely cleavage at S/M |
| AAEL005520-RB | PMT  | 0.062,0.068,0.056       | 182,77,121          | MET   | carbonic anhydrase                                       |
| AAEL012113-RA | T    | 0.054                   | 331                 | MET   | vacuolar ATP synthase proteolipid subunit                |
| AAEL013132-RB | K    | 0.077                   | 38                  | MET   | 6-phosphofructo-2-kinase/fructose-2 6-bisphosphatase     |
| AAEL017670-RA | PMT  | 0.064,0.061,0.054       | 249,223,212         | miRNA | miRNA                                                    |
| AAEL000526-RA | T    | 0.047                   | 28                  | MITO  | ATP synthase subunit f mito                              |
| AAEL000619-RA | PKM  | 0.067,0.103,0.057       | 724,726,658         | MITO  | ATP synthase subunit f mito                              |
| AAEL001718-RA | PKMT | 0.071,0.084,0.054,0.06  | 1223,1256,1161,1172 | MITO  | ATP synthase subunit f mito                              |
| AAEL001885-RA | PMT  | 0.059,0.058,0.061       | 53,159,73           | MITO  | ATP synthase subunit f mito                              |
| AAEL002431-RA | MT   | 0.057,0.058             | 494,549             | MITO  | ATP synthase subunit f mito                              |
| AAEL002897-RA | PKMT | 0.068,0.081,0.053,0.048 | 742,749,729,747     | MITO  | ATP synthase subunit f mito                              |
| AAEL006000-RC | MT   | 0.056,0.054             | 227,176             | MITO  | cytochrome c oxidase polypeptide 7A1                     |
| AAEL006118-RA | MT   | 0.056,0.057             | 107,61              | MITO  | mito ribosomal prot L55                                  |
| AAEL008059-RA | KMT  | 0.068,0.057,0.049       | 971,789,815         | MITO  | ATP synthase subunit f mito                              |
| AAEL008582-RA | P    | 0.086                   | 23                  | MITO  | 30S ribosomal prot S2(prokaryotic and organellar)        |
| AAEL009589-RA | M    | 0.059                   | 189                 | MITO  | Endonuclease G mito                                      |
| AAEL011010-RA | KT   | 0.106,0.05              | 725,710             | MITO  | ATP synthase subunit f mito                              |
| AAEL011110-RA | MT   | 0.051,0.049             | 471,460             | MITO  | ATP synthase subunit f mito                              |
| AAEL011391-RB | K    | 0.12                    | 26                  | MITO  | mito ribosomal prot S9                                   |
| AAEL014532-RA | T    | 0.058                   | 529                 | MITO  | ATP synthase subunit f mito                              |
| AAEL014681-RA | PKT  | 0.065,0.093,0.049       | 970,960,909         | MITO  | ATP synthase subunit f mito                              |
| AAEL017508-RA | M    | 0.057                   | 80                  | MITO  | mito dicarboxylate carrier                               |

|               |      |                         |                 |       |                                                   |
|---------------|------|-------------------------|-----------------|-------|---------------------------------------------------|
| AAEL017637-RA | K    | 0.099                   | 19              | ncRNA | U6 spliceosomal RNA                               |
| AAEL017645-RA | PKMT | 0.079,0.086,0.084,0.077 | 125,161,157,58  | ncRNA | U2 spliceosomal RNA                               |
| AAEL017739-RA | PKM  | 0.089,0.105,0.127       | 126,111,31      | ncRNA | U5 spliceosomal RNA                               |
| AAEL017763-RA | P    | 0.127                   | 20              | ncRNA | U6 spliceosomal RNA                               |
| AAEL017814-RA | K    | 0.073                   | 127             | ncRNA | U1 spliceosomal RNA                               |
| AAEL017860-RA | K    | 0.109                   | 110             | ncRNA | U1 spliceosomal RNA                               |
| AAEL017888-RA | PKM  | 0.102,0.088,0.074       | 108,115,109     | ncRNA | U5 spliceosomal RNA                               |
| AAEL017921-RA | T    | 0.059                   | 190             | ncRNA | 5.8S ribosomal RNA                                |
| AAEL003877-RA | MT   | 0.056,0.049             | 3170,3250       | PROT  | ubiquitin                                         |
| AAEL004121-RB | K    | 0.109                   | 97              | PROT  | ubiquitin-conjugating enzyme E2 q                 |
| AAEL009898-RA | M    | 0.05                    | 1933            | PROT  | proteasome subunit alpha type                     |
| AAEL014007-RA | K    | 0.1                     | 26              | PROT  | Serine protease easter                            |
| AAEL017399-RA | T    | 0.048                   | 3378            | PROT  | Glutamyl aminopeptidase                           |
| AAEL006588-RA | PKMT | 0.069,0.111,0.069,0.063 | 840,994,727,654 | ReDox | conserved hypo prot                               |
| AAEL007463-RA | K    | 0.077                   | 59              | ReDox | 5 10-methylenetetrahydrofolate reductase          |
| AAEL007523-RA | PMT  | 0.065,0.069,0.072       | 7423,7203,7165  | ReDox | peroxisomal n1-acetyl-spermine/spermidine oxidase |
| AAEL009685-RB | PMT  | 0.082,0.081,0.077       | 392,254,213     | ReDox | oxidoreductase                                    |
| AAEL013007-RA | M    | 0.056                   | 695             | ReDox | cytochrome c oxidase subunit VB                   |
| AAEL015588-RA | M    | 0.058                   | 12              | ReDox | 5p-1106   hydroxyacyl dehydrogenase               |
| AAEL001484-RA | PMT  | 0.082,0.076,0.079       | 628,567,310     | R/T/T | chromosome region maintenance prot 1/exportin     |
| AAEL002368-RA | PM   | 0.079,0.078             | 113,113         | R/T/T | 40S ribosomal prot S27                            |
| AAEL003382-RA | K    | 0.089                   | 227             | R/T/T | Ro ribonucleoprot autoantigen                     |
| AAEL004830-RA | PKMT | 0.079,0.074,0.085,0.089 | 509,597,494,374 | R/T/T | 60S ribosomal prot L18a                           |
| AAEL006785-RB | PKT  | 0.104,0.073,0.093       | 127,105,74      | R/T/T | 60S ribosomal prot L18a                           |
| AAEL007048-RB | PKT  | 0.112,0.102,0.089       | 151,163,80      | R/T/T | Zinc finger                                       |
| AAEL007925-RA | T    | 0.047                   | 743             | R/T/T | histone H2A                                       |
| AAEL008026-RA | T    | 0.048                   | 370             | R/T/T | MADF domain                                       |
| AAEL008447-RA | T    | 0.053                   | 717             | R/T/T | 60S ribosomal prot L18a                           |
| AAEL009118-RA | PKM  | 0.099,0.101,0.207       | 122,160,3       | R/T/T | histone H2A                                       |
| AAEL009400-RC | PM   | 0.08,0.087              | 213,148         | R/T/T | ccr4-associated factor                            |
| AAEL010335-RA | T    | 0.046                   | 257             | R/T/T | 60S ribosomal prot L18a                           |
| AAEL010468-RB | PMT  | 0.068,0.079,0.073       | 281,173,138     | R/T/T | DNA-directed RNA polymerase I 12kD-subunit        |
| AAEL010550-RA | PMT  | 0.069,0.066,0.069       | 778,775,700     | R/T/T | 60S ribosomal prot L18                            |
| AAEL011089-RB | K    | 0.112                   | 107             | R/T/T | ribonucleoprot                                    |
| AAEL011251-RA | M    | 0.058                   | 35              | R/T/T | RNA binding motif prot                            |
| AAEL011286-RA | P    | 0.061                   | 46              | R/T/T | conserved hypo prot                               |

|               |      |                         |                     |       |                         |
|---------------|------|-------------------------|---------------------|-------|-------------------------|
| AAEL012618-RA | K    | 0.069                   | 253                 | R/T/T | RNA-binding             |
| AAEL012921-RA | PMT  | 0.066,0.062,0.063       | 440,460,471         | R/T/T | ribosomal prot L36      |
| AAEL013682-RA | M    | 0.058                   | 1101                | R/T/T | zinc finger prot        |
| AAEL016019-RA | PKMT | 0.107,0.081,0.057,0.105 | 104,83,61,59        | R/T/T | tRNA-Asp Asp ATC        |
| AAEL017516-RC | K    | 0.072                   | 39                  | R/T/T | 60S ribosomal prot L23a |
| AAEL004246-RB | PK   | 0.1,0.126               | 39,36               | SigT  | still life sif          |
| AAEL006091-RA | PK   | 0.07,0.094              | 40,112              | SigT  | rab6                    |
| AAEL006786-RC | PKM  | 0.07,0.078,0.099        | 58,456,96           | SigT  | GTPase rho              |
| AAEL017480-RA | PKMT | 0.125,0.147,0.103,0.092 | 2005,1954,1988,2005 | SigT  | Ankyrin-1               |
| AAEL016262-RA | PK   | 0.137,0.102             | 44,118              | Trna  | Ala (not confirmed)     |
| AAEL016369-RA | PK   | 0.059,0.083             | 71,155              | tRNA  | Ala (not confirmed)     |
| AAEL016478-RA | PK   | 0.061,0.07              | 85,189              | tRNA  | Ala (not confirmed)     |
| AAEL016754-RA | K    | 0.073                   | 140                 | tRNA  | Ala (not confirmed)     |
| AAEL016890-RA | P    | 0.062                   | 61                  | tRNA  | Ala (not confirmed)     |
| AAEL016048-RA | K    | 0.124                   | 53                  | tRNA  | Ala(AGC antisense)      |
| AAEL016379-RA | PKMT | 0.074,0.08,0.078,0.077  | 237,241,180,184     | tRNA  | Ala(AGC antisense)      |
| AAEL016076-RA | K    | 0.11                    | 46                  | tRNA  | Ala(AGC antisense)      |
| AAEL016250-RA | PKM  | 0.075,0.089,0.117       | 46,98,9             | tRNA  | Ala(AGC antisense)      |
| AAEL016283-RA | PKM  | 0.065,0.076,0.078       | 119,156,107         | tRNA  | Ala(AGC antisense)      |
| AAEL016300-RA | P    | 0.231                   | 1                   | tRNA  | Ala(AGC antisense)      |
| AAEL016322-RA | M    | 0.052                   | 101                 | tRNA  | Ala(AGC antisense)      |
| AAEL016323-RA | K    | 0.08                    | 120                 | tRNA  | Ala(AGC antisense)      |
| AAEL016335-RA | PKT  | 0.105,0.085,0.095       | 23,24,37            | tRNA  | Ala(AGC antisense)      |
| AAEL016368-RA | PKM  | 0.106,0.113,0.074       | 117,130,38          | tRNA  | Ala(AGC antisense)      |
| AAEL016376-RA | PMT  | 0.059,0.052,0.06        | 222,138,123         | tRNA  | Ala(AGC antisense)      |
| AAEL016405-RA | P    | 0.066                   | 208                 | tRNA  | Ala(AGC antisense)      |
| AAEL016411-RA | PKMT | 0.089,0.073,0.267,0.066 | 90,111,3,18         | tRNA  | Ala(AGC antisense)      |
| AAEL016421-RA | K    | 0.116                   | 37                  | tRNA  | Ala(AGC antisense)      |
| AAEL016425-RA | PKMT | 0.071,0.071,0.076,0.094 | 147,120,41,42       | tRNA  | Ala(AGC antisense)      |
| AAEL016427-RA | PK   | 0.099,0.103             | 91,179              | tRNA  | Ala(AGC antisense)      |
| AAEL016433-RA | P    | 0.058                   | 6                   | tRNA  | Ala(AGC antisense)      |
| AAEL016606-RA | T    | 0.048                   | 105                 | tRNA  | Ala(AGC antisense)      |
| AAEL016623-RA | PK   | 0.095,0.116             | 59,52               | tRNA  | Ala(AGC antisense)      |
| AAEL016650-RA | PKM  | 0.072,0.07,0.091        | 141,201,81          | tRNA  | Ala(AGC antisense)      |
| AAEL016672-RA | PKMT | 0.071,0.08,0.066,0.069  | 207,205,153,173     | tRNA  | Ala(AGC antisense)      |
| AAEL016735-RA | P    | 0.067                   | 92                  | tRNA  | Ala(AGC antisense)      |

|               |      |                         |                 |      |                     |
|---------------|------|-------------------------|-----------------|------|---------------------|
| AAEL016760-RA | PK   | 0.1,0.086               | 70,133          | tRNA | Ala(AGC antisense)  |
| AAEL016761-RA | P    | 0.061                   | 23              | tRNA | Ala(AGC antisense)  |
| AAEL016782-RA | PKMT | 0.079,0.072,0.078,0.077 | 156,163,144,82  | tRNA | Ala(AGC antisense)  |
| AAEL016827-RA | PKM  | 0.133,0.118,0.11        | 83,148,64       | tRNA | Ala(AGC antisense)  |
| AAEL016937-RA | PKM  | 0.098,0.11,0.056        | 96,175,28       | tRNA | Ala(AGC antisense)  |
| AAEL016950-RA | P    | 0.087                   | 21              | tRNA | Ala(AGC antisense)  |
| AAEL016829-RA | T    | 0.071                   | 58              | tRNA | Ala(AGC antisense)  |
| AAEL016248-RA | T    | 0.058                   | 30              | tRNA | Ala(AGC antisense)  |
| AAEL016801-RA | P    | 0.124                   | 1               | tRNA | Ala(AGC antisense)  |
| AAEL016917-RA | P    | 0.065                   | 26              | tRNA | Ala(AGC antisense)  |
| AAEL016075-RA | PKMT | 0.087,0.078,0.071,0.081 | 182,186,134,126 | tRNA | Ala(AGC antisense)  |
| AAEL016160-RA | PKM  | 0.065,0.08,0.072        | 118,114,62      | tRNA | Ala(AGC antisense)  |
| AAEL016052-RA | M    | 0.056                   | 67              | tRNA | Ala(AGC antisense)  |
| AAEL016601-RA | PKMT | 0.074,0.077,0.087,0.07  | 120,147,98,87   | tRNA | Ala(TGC antisense)  |
| AAEL016536-RA | K    | 0.069                   | 90              | tRNA | Arg(ACG antisense)  |
| AAEL016554-RA | P    | 0.059                   | 19              | tRNA | Arg(ACG antisense)  |
| AAEL016592-RA | M    | 0.05                    | 33              | tRNA | Arg(ACG antisense)  |
| AAEL016256-RA | PKMT | 0.096,0.093,0.088,0.089 | 288,459,196,215 | tRNA | Arg(TCG antisense)  |
| AAEL016667-RA | PKMT | 0.084,0.091,0.089,0.079 | 160,165,160,144 | tRNA | Asn(GTT antisense)  |
| AAEL016231-RA | PMT  | 0.06,0.058,0.069        | 144,158,142     | tRNA | Asn(GTT antisense)  |
| AAEL016444-RA | K    | 0.114                   | 21              | tRNA | Asp(GTC antisense)  |
| AAEL016541-RA | P    | 0.09                    | 34              | tRNA | Asp(GTC antisense)  |
| AAEL016955-RA | T    | 0.046                   | 203             | tRNA | Asp(GTC antisense)  |
| AAEL016202-RA | T    | 0.046                   | 228             | tRNA | Asp(GTC antisense)  |
| AAEL016400-RA | MT   | 0.053,0.053             | 205,172         | tRNA | Cys(GCA antisense)  |
| AAEL016492-RA | PK   | 0.062,0.082             | 39,18           | tRNA | Cys(GCA antisense)  |
| AAEL016145-RA | M    | 0.053                   | 33              | tRNA | Glu (not confirmed) |
| AAEL016392-RA | P    | 0.064                   | 45              | tRNA | Glu (not confirmed) |
| AAEL016132-RA | PK   | 0.099,0.121             | 43,87           | tRNA | Glu(CTC antisense)  |
| AAEL016148-RA | KM   | 0.091,0.079             | 56,45           | tRNA | Glu(CTC antisense)  |
| AAEL016473-RA | M    | 0.082                   | 26              | tRNA | Glu(CTC antisense)  |
| AAEL016557-RA | PK   | 0.072,0.09              | 56,126          | tRNA | Glu(TTC antisense)  |
| AAEL016856-RA | PK   | 0.069,0.085             | 54,97           | tRNA | Glu(TTC antisense)  |
| AAEL016705-RA | M    | 0.055                   | 7               | tRNA | Gly (not confirmed) |
| AAEL016508-RA | M    | 0.062                   | 34              | tRNA | Gly (not confirmed) |
| AAEL016191-RA | PMT  | 0.061,0.074,0.059       | 13,22,8         | tRNA | Gly(GCC antisense)  |

|               |      |                         |                 |      |                               |
|---------------|------|-------------------------|-----------------|------|-------------------------------|
| AAEL016009-RA | PKMT | 0.085,0.08,0.089,0.081  | 41,159,8,58     | tRNA | Gly(GCC antisense)            |
| AAEL016274-RA | M    | 0.054                   | 25              | tRNA | Gly(TCC antisense)            |
| AAEL016689-RA | P    | 0.062                   | 16              | tRNA | Gly(TCC antisense)            |
| AAEL016879-RA | PMT  | 0.069,0.065,0.065       | 417,334,386     | tRNA | His(GTG antisense)            |
| AAEL016458-RA | PK   | 0.062,0.068             | 83,135          | tRNA | His(GTG antisense)            |
| AAEL016104-RA | K    | 0.121                   | 58              | tRNA | Leu(CAG antisense)            |
| AAEL016396-RA | T    | 0.062                   | 86              | tRNA | Leu(AAG antisense)            |
| AAEL016436-RA | P    | 0.11                    | 5               | tRNA | Leu(GAG antisense)            |
| AAEL016803-RA | PKMT | 0.11,0.087,0.095,0.099  | 183,295,116,147 | tRNA | Leu(GAG antisense)            |
| AAEL016406-RA | T    | 0.06                    | 14              | tRNA | Leu(TAG antisense)            |
| AAEL016865-RA | M    | 0.06                    | 55              | tRNA | Leu(TAG antisense)            |
| AAEL016239-RA | PKMT | 0.073,0.083,0.117,0.073 | 136,149,10,65   | tRNA | Lys(CTT antisense)            |
| AAEL016268-RA | T    | 0.057                   | 29              | tRNA | Lys(CTT antisense)            |
| AAEL016178-RA | PK   | 0.073,0.068             | 12,53           | tRNA | Lys(CTT antisense)            |
| AAEL016669-RA | P    | 0.062                   | 8               | tRNA | Met(CAT antisense)            |
| AAEL016226-RA | K    | 0.072                   | 51              | tRNA | Met(CAT antisense)            |
| AAEL016943-RA | PT   | 0.061,0.072             | 129,82          | tRNA | Pro(AGG antisense)            |
| AAEL016520-RA | PKT  | 0.062,0.096,0.12        | 28,92,15        | tRNA | Pro(TGG antisense)            |
| AAEL016291-RA | T    | 0.116                   | 2               | tRNA | Pseudogene Ala(AGC antisense) |
| AAEL016304-RA | K    | 0.084                   | 41              | tRNA | Pseudogene Ala(AGC antisense) |
| AAEL016314-RA | K    | 0.135                   | 29              | tRNA | Pseudogene Ala(AGC antisense) |
| AAEL016364-RA | PKMT | 0.105,0.116,0.108,0.103 | 150,180,119,46  | tRNA | Pseudogene Ala(AGC antisense) |
| AAEL016378-RA | PK   | 0.09,0.158              | 13,95           | tRNA | Pseudogene Ala(AGC antisense) |
| AAEL016418-RA | PKM  | 0.075,0.07,0.093        | 118,89,87       | tRNA | Pseudogene Ala(AGC antisense) |
| AAEL016502-RA | K    | 0.114                   | 86              | tRNA | Pseudogene Ala(AGC antisense) |
| AAEL016572-RA | PKM  | 0.087,0.095,0.098       | 127,221,32      | tRNA | Pseudogene Ala(AGC antisense) |
| AAEL016748-RA | PKMT | 0.112,0.082,0.115,0.099 | 97,206,55,45    | tRNA | Pseudogene Ala(AGC antisense) |
| AAEL016795-RA | P    | 0.069                   | 34              | tRNA | Pseudogene Ala(AGC antisense) |
| AAEL016798-RA | MT   | 0.053,0.056             | 117,65          | tRNA | Pseudogene Ala(AGC antisense) |
| AAEL016804-RA | PKMT | 0.108,0.132,0.13,0.13   | 108,111,66,84   | tRNA | Pseudogene Ala(AGC antisense) |
| AAEL016821-RA | K    | 0.109                   | 31              | tRNA | Pseudogene Ala(AGC antisense) |
| AAEL016846-RA | K    | 0.117                   | 64              | tRNA | Pseudogene Ala(AGC antisense) |
| AAEL016916-RA | PKMT | 0.092,0.092,0.098,0.076 | 179,276,91,163  | tRNA | Pseudogene Ala(AGC antisense) |
| AAEL016089-RA | K    | 0.108                   | 186             | tRNA | Pseudogene Ala(AGC antisense) |
| AAEL016390-RA | PKMT | 0.086,0.083,0.087,0.072 | 301,333,61,69   | tRNA | Pseudogene Glu(CTC antisense) |
| AAEL016832-RA | T    | 0.048                   | 64              | tRNA | Pseudogene Phe(AAA antisense) |

|               |      |                         |                 |      |                                              |
|---------------|------|-------------------------|-----------------|------|----------------------------------------------|
| AAEL016219-RA | PKMT | 0.102,0.098,0.076,0.116 | 107,146,119,62  | tRNA | Pseudogene Val(GAC antisense)                |
| AAEL016067-RA | PMT  | 0.06,0.059,0.049        | 85,65,65        | tRNA | Ser(CGA antisense))                          |
| AAEL016223-RA | PKMT | 0.077,0.074,0.082,0.054 | 170,195,148,128 | tRNA | Ser(AGA antisense)                           |
| AAEL016065-RA | P    | 0.063                   | 118             | tRNA | Ser(CGA antisense)                           |
| AAEL016066-RA | PKMT | 0.068,0.067,0.07,0.068  | 431,496,392,431 | tRNA | Ser(CGA antisense)                           |
| AAEL016951-RA | PK   | 0.06,0.068              | 35,165          | tRNA | Ser(not confirmed)                           |
| AAEL016180-RA | P    | 0.073                   | 51              | tRNA | Thr(AGT antisense)                           |
| AAEL016237-RA | K    | 0.096                   | 47              | tRNA | Tyr(GTA antisense)                           |
| AAEL016150-RA | KM   | 0.083,0.059             | 137,6           | tRNA | Tyr(GTA antisense)                           |
| AAEL016154-RA | PK   | 0.084,0.116             | 48,122          | tRNA | Tyr(GTA antisense)                           |
| AAEL016157-RA | KT   | 0.069,0.062             | 111,54          | tRNA | Tyr(GTA antisense)                           |
| AAEL016316-RA | PKM  | 0.102,0.079,0.231       | 146,83,1        | tRNA | Val(AAC antisense)                           |
| AAEL016627-RA | P    | 0.12                    | 29              | tRNA | Val(AAC antisense)                           |
| AAEL016880-RA | PMT  | 0.065,0.067,0.064       | 186,181,145     | tRNA | Val(AAC antisense)                           |
| AAEL016043-RA | K    | 0.092                   | 5               | tRNA | Val(AAC antisense)                           |
| AAEL016404-RA | PKM  | 0.083,0.087,0.092       | 174,198,74      | tRNA | Val(not confirmed)                           |
| AAEL000309-RB | M    | 0.064                   | 50              | TRP  | Cytokine receptor                            |
| AAEL001125-RA | PKMT | 0.091,0.132,0.056,0.046 | 600,511,572,616 | TRP  | p15-2b prot                                  |
| AAEL001516-RA | PK   | 0.071,0.081             | 10,138          | TRP  | 5p-1810 vesicle associated prot              |
| AAEL002436-RC | PKT  | 0.095,0.091,0.085       | 77,70,22        | TRP  | Trimeric intracellular cation channel type B |
| AAEL004268-RA | PMT  | 0.059,0.06,0.056        | 2671,2060,1723  | TRP  | Sialin Sodium/sialic acid cotransporter      |
| AAEL007521-RB | K    | 0.126                   | 8               | TRP  | importin beta-2                              |
| AAEL007580-RA | PK   | 0.079,0.092             | 1030,1107       | TRP  | NTF2-related export prot                     |
| AAEL010579-RA | K    | 0.071                   | 1498            | TRP  | Lipid storage droplets surface-binding       |
| AAEL011825-RC | K    | 0.071                   | 11              | TRP  | aryl hydrocarbon receptor                    |
| AAEL012288-RA | M    | 0.059                   | 803             | TRP  | sugar transporter                            |
| AAEL009600-RB | PKMT | 0.078,0.072,0.078,0.087 | 731,904,446,329 | TRP  | 20-hydroxy-ecdysone receptor                 |
| AAEL000304-RC | MT   | 0.058,0.056             | 202,107         | UNK  | conserved hypo prot                          |
| AAEL000348-RA | PMT  | 0.076,0.069,0.075       | 148,168,117     | UNK  | conserved hypo prot                          |
| AAEL000473-RA | PMT  | 0.059,0.051,0.053       | 2242,2130,1876  | UNK  | hypo prot                                    |
| AAEL001495-RB | M    | 0.057                   | 673             | UNK  | conserved hypo prot                          |
| AAEL001561-RB | K    | 0.091                   | 52              | UNK  | conserved hypo prot                          |
| AAEL001712-RA | PM   | 0.064,0.053             | 340,247         | UNK  | hypo prot                                    |
| AAEL002180-RA | PMT  | 0.066,0.059,0.05        | 777,793,769     | UNK  | hypo prot                                    |
| AAEL002573-RA | T    | 0.05                    | 285             | UNK  | hypo prot                                    |
| AAEL002604-RA | PT   | 0.059,0.055             | 1194,1375       | UNK  | SH3 domain-containing                        |



|               |      |                         |                     |     |                       |
|---------------|------|-------------------------|---------------------|-----|-----------------------|
| AAEL002884-RA | MT   | 0.05,0.051              | 858,787             | UNK | hypo prot             |
| AAEL005161-RA | T    | 0.046                   | 838                 | UNK | hypo prot             |
| AAEL005758-RA | MT   | 0.051,0.048             | 497,502             | UNK | conserved hypo prot   |
| AAEL006470-RA | PKMT | 0.071,0.07,0.064,0.055  | 3511,5905,2863,2873 | UNK | hypo prot             |
| AAEL006644-RA | T    | 0.047                   | 3351                | UNK | hypo prot             |
| AAEL006846-RA | M    | 0.058                   | 292                 | UNK | hypo prot             |
| AAEL006914-RA | PMT  | 0.063,0.062,0.078       | 419,201,187         | UNK | hypo prot             |
| AAEL006943-RA | MT   | 0.057,0.056             | 9491,8900           | UNK | hypo prot             |
| AAEL007571-RA | M    | 0.054                   | 862                 | UNK | hypo prot             |
| AAEL007645-RA | MT   | 0.053,0.051             | 590,546             | UNK | hypo prot             |
| AAEL007734-RA | T    | 0.047                   | 311                 | UNK | conserved hypo prot   |
| AAEL008808-RA | T    | 0.054                   | 526                 | UNK | hypo prot             |
| AAEL009065-RA | T    | 0.05                    | 815                 | UNK | hypo prot             |
| AAEL009322-RA | M    | 0.052                   | 293                 | UNK | hypo prot             |
| AAEL009552-RA | PMT  | 0.059,0.055,0.047       | 712,773,799         | UNK | hypo prot             |
| AAEL009633-RA | T    | 0.049                   | 811                 | UNK | conserved hypo prot   |
| AAEL010325-RA | PT   | 0.059,0.054             | 894,1058            | UNK | hypo prot             |
| AAEL010634-RA | PKMT | 0.066,0.069,0.078,0.098 | 106,133,68,57       | UNK | hypo prot             |
| AAEL010690-RA | M    | 0.055                   | 349                 | UNK | hypo prot             |
| AAEL010746-RA | PMT  | 0.066,0.059,0.057       | 1354,1287,1170      | UNK | hypo prot             |
| AAEL010849-RA | PKT  | 0.06,0.091,0.046        | 1619,1913,1253      | UNK | NTF2-related          |
| AAEL011160-RA | MT   | 0.054,0.05              | 452,453             | UNK | predicted prot        |
| AAEL011207-RA | KT   | 0.068,0.048             | 2854,1711           | UNK | hypo prot             |
| AAEL011618-RA | M    | 0.058                   | 237                 | UNK | conserved hypo prot   |
| AAEL011829-RA | T    | 0.049                   | 250                 | UNK | hypo prot             |
| AAEL011894-RA | T    | 0.076                   | 84                  | UNK | hypo prot             |
| AAEL011971-RA | KM   | 0.07,0.055              | 1141,1053           | UNK | Nicastrin             |
| AAEL012196-RA | M    | 0.057                   | 751                 | UNK | conserved hypo prot   |
| AAEL012331-RA | M    | 0.053                   | 452                 | UNK | SH3 domain-containing |
| AAEL012849-RB | PKT  | 0.078,0.085,0.067       | 81,82,57            | UNK | hypo prot             |
| AAEL013655-RA | PMT  | 0.058,0.055,0.058       | 1108,811,713        | UNK | conserved hypo prot   |
| AAEL013838-RA | PKMT | 0.063,0.079,0.059,0.063 | 1835,2092,1371,907  | UNK | hypo prot             |
| AAEL014726-RA | MT   | 0.05,0.055              | 2205,1751           | UNK | conserved hypo prot   |
| AAEL014955-RA | PMT  | 0.06,0.06,0.064         | 3322,1980,1599      | UNK | tartan prot           |
| AAEL015091-RA | PMT  | 0.064,0.071,0.092       | 1341,759,322        | UNK | hypo prot             |
| AAEL015509-RA | T    | 0.05                    | 219                 | UNK | conserved hypo prot   |

|               |     |                   |             |     |           |
|---------------|-----|-------------------|-------------|-----|-----------|
| AAEL016980-RA | MT  | 0.054,0.056       | 908,1016    | UNK | hypo prot |
| AAEL017279-RA | T   | 0.047             | 436         | UNK | hypo prot |
| AAEL017605-RA | T   | 0.056             | 87          | UNK | hypo prot |
| AAEL008230-RA | KMT | 0.094,0.096,0.097 | 466,183,131 | UNK | hypo prot |

---

\* Functional classes: 'CYT/STR', cytoskeletal and structural; 'DIV', diverse functions; FAT, Fatty Acid Metabolism; 'IMM', immunity-and apoptosis-related; 'MET', metabolism; 'miRNA' microRNA; 'MITO', mitochondrial; 'ncRNA' non-coding RNA; 'PROT', proteolysis or 26S proteasome function; 'R/T/T', replication, transcription, and translation; 'ReDox', reduction/oxidation and oxidoreductive stress; 'SigT', Signal Transduction; 'TRP', transport or signaling; 'UNK', unknown functions.
