# Supplementary material for: Exon-Enriched Libraries Reveal Large Genic Differences Between Aedes aegypti from Senegal, West Africa, and Populations Outside Africa
Source: Oxford University Press journal article supplement (doi:10.1534/g3.116.036053), 2017-02-01
Supplement: 036053_tables3.pdf [file 036053_tables3.pdf]

Table S3. Comparisons yielding lower 1% of FST values.

| VectorBase    | FST<br>PK10<br>Mer | nSN<br>Ps | FST<br>PK10<br>Kao | nSNPs | FST<br>PK10<br>Thai | nSN<br>Ps | FST<br>Kao<br>Mer | nSN<br>Ps | FST<br>Kao<br>Thai | nSN<br>Ps | FST<br>Mer<br>Thai | nS<br>NPs | Group | Annotation                                  |
|---------------|--------------------|-----------|--------------------|-------|---------------------|-----------|-------------------|-----------|--------------------|-----------|--------------------|-----------|-------|---------------------------------------------|
| AAEL000158-RA | 0.013              | 1145      | 0.008              | 1625  | 0.016               | 1045      | -                 | -         | -                  | -         | -                  | -         | DIV   | T-box transcription factor tbx2             |
| AAEL002419-RA | -                  | -         | 0.007              | 2418  | -                   | -         | 0.011             | 1634      | 0.010              | 1454      | -                  | -         | DIV   | sarcolemmal associated ptn-2                |
| AAEL004700-RA | 0.016              | 721       | 0.008              | 1007  | 0.009               | 665       | -                 | -         | -                  | -         | -                  | -         | DIV   | cdk1/4                                      |
| AAEL005500-RA | 0.017              | 1503      | 0.004              | 2410  | 0.015               | 1473      | -                 | -         | -                  | -         | -                  | -         | DIV   | cons hypo ptn                               |
| AAEL009372-RA | 0.017              | 142       | 0.003              | 296   | 0.005               | 79        | -                 | -         | -                  | -         | -                  | -         | DIV   | Meiotically up-regulated gene               |
| AAEL009458-RB | 0.012              | 544       | 0.004              | 767   | 0.007               | 530       | 0.010             | 543       | 0.008              | 502       | -                  | -         | DIV   | syntaxin 4                                  |
| AAEL011236-RA | 0.017              | 615       | 0.009              | 1132  | 0.007               | 473       | -                 | -         | -                  | -         | -                  | -         | DIV   | Calcineurin-binding                         |
| AAEL015064-RB | 0.016              | 385       | 0.008              | 562   | 0.013               | 286       | 0.014             | 368       | 0.010              | 264       | -                  | -         | DIV   | Small ubiquitin-related                     |
| AAEL017184-RA | 0.008              | 390       | 0.007              | 879   | 0.013               | 465       | -                 | -         | -                  | -         | -                  | -         | DIV   | Kelch-like                                  |
| AAEL007765-RC | 0.007              | 403       | 0.005              | 572   | 0.011               | 317       | 0.006             | 395       | 0.007              | 293       | -                  | -         | IMM   | Serpin likely cleavage at K/R. Transcript A |
| AAEL007765-RD | 0.016              | 323       | 0.005              | 572   | 0.011               | 317       | -                 | -         | -                  | -         | -                  | -         | IMM   | Serpin likely cleavage at K/R. Transcript A |
| AAEL007308-RA | 0.012              | 946       | 0.009              | 1500  | 0.009               | 923       | 0.016             | 897       | 0.011              | 873       | -                  | -         | MET   | Alpha-1 2-mannosyltransferase ALG9          |
| AAEL017730-RA | 0.001              | 133       | 0.001              | 160   | 0.006               | 141       | 0.006             | 130       | 0.002              | 135       | 0.005              | 111       | miRNA | microRNA                                    |
| AAEL006000-RC | 0.009              | 185       | 0.002              | 194   | 0.008               | 139       | 0.004             | 185       | 0.002              | 139       | 0.005              | 130       | MITO  | cytochrome c oxidase polypeptide 7A1        |
| AAEL017921-RA | 0.009              | 152       | 0.005              | 175   | 0.006               | 137       | -                 | -         | -                  | -         | -                  | -         | ncRNA | 5.8S ribosomal RNA                          |
| AAEL007316-RA | 0.008              | 7866      | 0.004              | 10178 | 0.006               | 7401      | 0.007             | 7663      | 0.005              | 7195      | -                  | -         | PROT  | Kyphoscoliosis peptidase                    |
| AAEL009685-RA | -                  | -         | -                  | -     | 0.008               | 135       | -                 | -         | 0.012              | 131       | 0.002              | 138       | ReDox | oxidoreductase                              |
| AAEL007505-RA | 0.010              | 2268      | 0.008              | 2909  | 0.008               | 2266      | -                 | -         | -                  | -         | -                  | -         | R/T/T | iroquois-class homeodomain ptn irx          |

|               |       |      |       |      |       |      |       |      |       |      |       |     |       |                                           |
|---------------|-------|------|-------|------|-------|------|-------|------|-------|------|-------|-----|-------|-------------------------------------------|
| AAEL008026-RA | 0.004 | 277  | 0.000 | 389  | 0.009 | 291  | 0.004 | 263  | 0.007 | 280  | 0.005 | 257 | R/T/T | MADF domain                               |
| AAEL008575-RA | 0.014 | 2254 | 0.008 | 3205 | 0.009 | 1914 | -     | -    | -     | -    | -     | -   | R/T/T | regulator of chromosome condensation      |
| AAEL010468-RB | 0.010 | 72   | 0.004 | 126  | 0.011 | 66   | 0.016 | 71   | 0.011 | 62   | -     | -   | R/T/T | DNA-directed RNA polymerase I 12kD-subu   |
| AAEL011162-RA | 0.013 | 721  | 0.007 | 1137 | 0.015 | 602  | -     | -    | -     | -    | -     | -   | R/T/T | Anaphase Promoting Complex putative       |
| AAEL000737-RB | 0.016 | 267  | -     | -    | -     | -    | 0.008 | 239  | -     | -    | 0.002 | 276 | SigT  | rab6 GTPase activating ptn gapcena (rabga |
| AAEL006936-RA | 0.011 | 1099 | 0.006 | 1750 | 0.013 | 916  | -     | -    | -     | -    | -     | -   | SigT  | cons hypo ptn                             |
| AAEL015250-RA | -     | -    | 0.005 | 17   | -     | -    | 0.002 | 15   | 0.000 | 27   | -     | -   | SigT  | AmphiWnt7b putative                       |
| AAEL016379-RA | 0.003 | 143  | 0.003 | 200  | 0.007 | 141  | -     | -    | -     | -    | -     | -   | tRNA  | Ala (AGC antisense)                       |
| AAEL016479-RA | 0.014 | 100  | 0.007 | 130  | 0.015 | 117  | -     | -    | -     | -    | -     | -   | tRNA  | Ala (AGC antisense)                       |
| AAEL016672-RA | 0.011 | 139  | 0.004 | 169  | 0.009 | 139  | -     | -    | 0.007 | 135  | 0.006 | 128 | tRNA  | Ala (AGC antisense)                       |
| AAEL016256-RA | 0.001 | 177  | 0.001 | 212  | 0.003 | 169  | -     | -    | -     | -    | -     | -   | tRNA  | Arg (TCG antisense)                       |
| AAEL016667-RA | 0.002 | 143  | -     | -    | 0.005 | 130  | 0.003 | 143  | 0.001 | 129  | 0.005 | 126 | tRNA  | Asn (GTT antisense)                       |
| AAEL016955-RA | 0.011 | 135  | 0.004 | 220  | 0.012 | 114  | 0.012 | 128  | 0.013 | 104  |       |     | tRNA  | Asp (GTC antisense)                       |
| AAEL016842-RA | 0.016 | 7    | 0.007 | 18   | 0.004 | 10   | -     | -    | -     | -    | -     | -   | tRNA  | Pro (AGG antisense)                       |
| AAEL016401-RA | 0.017 | 35   | -     | -    | -     | -    | 0.012 | 58   | -     | -    | 0.004 | 32  | tRNA  | Pro (AGG antisense)                       |
| AAEL016066-RA | 0.014 | 272  | 0.001 | 316  | 0.006 | 317  | -     | -    | -     | -    | -     | -   | tRNA  | Ser (CGA antisense)                       |
| AAEL002472-RA | 0.006 | 1032 | 0.004 | 1092 | 0.003 | 1083 | 0.010 | 973  | 0.006 | 1011 | -     | -   | UNK   | hypo ptn                                  |
| AAEL003948-RA | 0.016 | 460  | 0.005 | 512  | 0.016 | 525  | -     | -    | -     | -    | -     | -   | UNK   | hypo ptn                                  |
| AAEL004208-RA | 0.007 | 267  | -     | -    | 0.005 | 311  | 0.010 | 222  | 0.006 | 273  | 0.002 | 224 | UNK   | hypo ptn                                  |
| AAEL006284-RA | 0.010 | 61   | 0.004 | 73   | 0.010 | 72   | 0.013 | 49   | 0.007 | 60   |       |     | UNK   | hypo ptn                                  |
| AAEL006470-RA | 0.012 | 1449 | 0.006 | 2062 | 0.015 | 1356 | -     | -    | -     | -    | -     | -   | UNK   | hypo ptn                                  |
| AAEL006914-RA | 0.010 | 145  | 0.001 | 209  | 0.012 | 155  | -     | -    | -     | -    | -     | -   | UNK   | hypo ptn                                  |
| AAEL006943-RA | 0.006 | 5823 | 0.004 | 6455 | 0.005 | 5656 | 0.010 | 5470 | 0.005 | 5401 | 0.002 |     | UNK   | hypo ptn                                  |

|               |       |      |       |      |       |      |       |      |       |      |       |     |     |               |
|---------------|-------|------|-------|------|-------|------|-------|------|-------|------|-------|-----|-----|---------------|
| AAEL007314-RA | 0.011 | 2006 | 0.004 | 2672 | 0.007 | 1944 | 0.008 | 1925 | 0.006 | 1863 | -     | -   | UNK | hypo ptn      |
| AAEL007319-RA | 0.015 | 263  | -     | -    | -     | -    | 0.012 | 244  | -     | -    | 0.004 | 230 | UNK | cons hypo ptn |
| AAEL008230-RA | 0.009 | 146  | 0.006 | 150  | 0.004 | 80   | 0.009 | 157  | 0.009 | 79   | -     | -   | UNK | hypo ptn      |
| AAEL009095-RA | 0.010 | 347  | -     | -    | 0.010 | 340  | 0.010 | 345  | 0.012 | 356  | 0.005 | 292 | UNK | hypo ptn      |
| AAEL009818-RA | 0.009 | 1412 | 0.003 | 1966 | 0.008 | 1058 | 0.013 | 1375 | 0.007 | 1008 | -     | -   | UNK | cons hypo ptn |
| AAEL010049-RA | 0.009 | 1022 | 0.008 | 1327 | 0.014 | 963  | -     | -    | -     | -    | -     | -   | UNK | hypo ptn      |
| AAEL013402-RB | 0.015 | 751  | 0.007 | 410  | 0.012 | 131  | -     | -    | -     | -    | -     | -   | UNK | hypo ptn      |
| AAEL014954-RA | 0.017 | 517  | 0.006 | 1239 | 0.006 | 423  | 0.012 | 498  | 0.007 | 410  | -     | -   | UNK | hypo ptn      |
| AAEL016980-RA | -     | -    | -     | -    | 0.014 | 394  | -     | -    | 0.009 | 387  | 0.006 | 337 | UNK | hypo ptn      |

---

\* Functional classes: 'DIV', diverse functions; 'IMM', immunity-and apoptosis-related; 'MET', metabolism; 'miRNA' microRNA; 'MITO', mitochondrial; 'ncRNA', non-coding RNA; 'PROT', proteolysis or 26S proteasome function; 'R/T/T', replication, transcription, and translation; 'ReDox', reduction/oxidation and oxidoreductive stress; 'SigT' Signal Transduction; 'UNK', unknown functions.
