# Supplementary material for: Exon-Enriched Libraries Reveal Large Genic Differences Between Aedes aegypti from Senegal, West Africa, and Populations Outside Africa
Source: Oxford University Press journal article supplement (doi:10.1534/g3.116.036053), 2017-02-01
Supplement: 036053_tables4.pdf [file 036053_tables4.pdf]

Table S4. Comparisons yielding upper 1% of FST values.

| VectorBase | FST<br>PK10<br>Mer | nSNPs | FST<br>PK10<br>Kao | nSNPs | FST<br>PK10<br>Thai | nSNPs | FST<br>Kao<br>Mer | nSNPs | FST<br>Kao<br>Thai | nSNPs | FST<br>Mer<br>Thai | nSNPs | Group   | Annotation                                                       |
|------------|--------------------|-------|--------------------|-------|---------------------|-------|-------------------|-------|--------------------|-------|--------------------|-------|---------|------------------------------------------------------------------|
| AAEL001826 | -                  | -     | 0.561              | 126   | -                   | -     | 0.753             | 89    | 0.707              | 121   | -                  | -     | CSR     | odorant-binding protein<br>56a, putative                         |
| AAEL015147 | 0.716              | 302   | 0.541              | 292   | 0.691               | 326   | -                 | -     | -                  | -     | -                  | -     | CSR     | odorant receptor                                                 |
| AAEL017221 | 0.752              | 172   | 0.722              | 167   | 0.859               | 175   | -                 | -     | -                  | -     | -                  | -     | CSR     | odorant receptor                                                 |
| AAEL009807 | 0.742              | 188   | 0.549              | 206   | 0.729               | 193   | -                 | -     | -                  | -     | -                  | -     | CYT/STR | cuticle protein, putative                                        |
| AAEL010407 | 0.639              | 175   | 0.565              | 259   | 0.694               | 173   | -                 | -     | -                  | -     | -                  | -     | CYT/STR | claudin superfamily                                              |
| AAEL011982 | 0.679              | 569   | 0.538              | 674   | 0.682               | 677   | -                 | -     | -                  | -     | -                  | -     | CYT/STR | cortactin                                                        |
| AAEL002781 | 0.752              | 99    | 0.686              | 109   | 0.737               | 104   | -                 | -     | -                  | -     | -                  | -     | DIV     | galactokinase                                                    |
| AAEL003022 | -                  | -     | 0.636              | 42    | -                   | -     | 0.665             | 29    | 0.694              | 29    | -                  | -     | DIV     | serine/threonine-protein<br>kinase                               |
| AAEL004050 | 0.649              | 261   | 0.529              | 347   | 0.715               | 290   | -                 | -     | -                  | -     | -                  | -     | DIV     | diphosphomevalonate<br>decarboxylase                             |
| AAEL004240 | 0.658              | 234   | 0.545              | 263   | 0.699               | 289   | -                 | -     | -                  | -     | -                  | -     | DIV     | gamma glutamyl<br>transpeptidases                                |
| AAEL005117 | -                  | -     | -                  | -     | 0.803               | 98    | -                 | -     | 0.917              | 79    | 0.863              | 73    | DIV     | 5p-1878 hypo protein<br>Mito.                                    |
| AAEL009759 | 0.637              | 150   | 0.523              | 134   | 0.740               | 156   | -                 | -     | -                  | -     | -                  | -     | DIV     | Distribution/morphology,<br>apoptosis                            |
| AAEL010417 | 0.771              | 108   | 0.711              | 133   | 0.762               | 111   | -                 | -     | -                  | -     | -                  | -     | DIV     | phosphotransferase                                               |
| AAEL010477 | 0.703              | 105   | 0.675              | 137   | 0.758               | 9     | -                 | -     | -                  | -     | -                  | -     | DIV     | Hotdog domain                                                    |
| AAEL011972 | 0.826              | 148   | 0.604              | 176   | 0.796               | 174   | -                 | -     | -                  | -     | -                  | -     | DIV     | actin binding protein,<br>putative                               |
| AAEL013152 | 0.657              | 575   | 0.555              | 641   | 0.723               | 595   | -                 | -     | -                  | -     | -                  | -     | DIV     | Extensin                                                         |
| AAEL013157 | 0.692              | 352   | 0.665              | 399   | 0.755               | 389   | -                 | -     | -                  | -     | -                  | -     | DIV     | Extensin                                                         |
| AAEL013330 | 0.640              | 89    | 0.543              | 98    | 0.685               | 94    | -                 | -     | -                  | -     | -                  | -     | DIV     | alkaline phosphatase                                             |
| AAEL013658 | -                  | -     | -                  | -     | 0.704               | 102   | -                 | -     | 0.816              | 84    | 0.882              | 51    | DIV     | conserved hypo protein                                           |
| AAEL013764 | -                  | -     | -                  | -     | 0.759               | 112   | -                 | -     | 0.768              | 56    | 0.713              | 29    | DIV     | WD-repeat protein                                                |
| AAEL015053 | -                  | -     | 0.665              | 28    | -                   | -     | 0.758             | 19    | 0.808              | 2     | -                  | -     | DIV     | 2-oxo-4-hydroxy-4-carboxy-<br>5-ureidoimidazole<br>decarboxylase |
| AAEL015481 | 0.847              | 30    | 0.844              | 28    | 0.797               | 31    | -                 | -     | -                  | -     | -                  | -     | DIV     | neuronal calcium sensor,<br>putative                             |
| AAEL007336 | 0.889              | 40    | -                  | -     | -                   | -     | 0.929             | 31    | -                  | -     | 0.876              | 28    | PROT    | ubiquitin-conjugating<br>enzyme E2 q                             |
| AAEL007992 | 0.754              | 172   | 0.633              | 204   | 0.673               | 189   | -                 | -     | -                  | -     | -                  | -     | PROT    | cysteine/serine peptidase                                        |

|            |       |     |       |     |       |     |       |     |       |     |       |     |       |                                                    |
|------------|-------|-----|-------|-----|-------|-----|-------|-----|-------|-----|-------|-----|-------|----------------------------------------------------|
| AAEL007946 | 0.701 | 367 | -     | -   | -     | -   | 0.690 | 340 | -     | -   | 0.883 | 352 | ReDox | GSTE6                                              |
| AAEL007948 | -     | -   | -     | -   | 0.666 | 138 | -     | -   | 0.690 | 136 | 0.897 | 166 | ReDox | GSTE7                                              |
| AAEL007951 | -     | -   | -     | -   | 0.727 | 315 | -     | -   | 0.787 | 291 | 0.922 | 375 | ReDox | GSTE2                                              |
| AAEL007962 | 0.699 | 266 | -     | -   | -     | -   | 0.759 | 231 | -     | -   | 0.901 | 264 | ReDox | GSTE4                                              |
| AAEL012491 | 0.634 | 214 | 0.639 | 159 | 0.792 | 224 | -     | -   | -     | -   | -     | -   | ReDox | CYP6P12                                            |
| AAEL014891 | 0.673 | 241 | 0.634 | 341 | 0.768 | 297 | 0.682 | 241 | 0.700 | 303 | 0.740 | 206 | ReDox | CYP6P12                                            |
| AAEL012638 | -     | -   | 0.650 | 24  | -     | -   | 0.849 | 18  | 0.769 | 18  | -     | -   | R/T/T | nuclease HARBI1                                    |
| AAEL013154 | 0.676 | 236 | 0.709 | 212 | 0.707 | 246 | -     | -   | -     | -   | -     | -   | R/T/T | Zinc finger                                        |
| AAEL013687 | 0.640 | 16  | -     | -   | -     | -   | 0.839 | 31  | -     | -   | 0.698 | 21  | R/T/T | SAGA-associated factor 29                          |
| AAEL016997 | -     | -   | -     | -   | 0.831 | 105 | -     | -   | 0.885 | 97  | 0.550 | 74  | SigT  | GPCR Gastrin/Bombesin Family                       |
| AAEL017410 | -     | -   | -     | -   | 0.678 | 100 | -     | -   | 0.723 | 82  | 0.701 | 69  | SigT  | GPCR Gastrin/Bombesin Family                       |
| AAEL007950 | -     | -   | -     | -   | 0.674 | 409 | -     | -   | 0.681 | 293 | 0.696 | 268 | TRP   | Epidermal growth factor receptor substrate 15-like |
| AAEL014911 | 0.656 | 163 | 0.677 | 170 | 0.692 | 159 | -     | -   | -     | -   | -     | -   | TRP   | synaptic vesicle protein                           |
| AAEL000096 | 0.654 | 94  | -     | -   | -     | -   | 0.688 | 72  | -     | -   | 0.745 | 74  | UNK   | conserved hypo protein                             |
| AAEL001911 | 0.844 | 94  | 0.560 | 97  | 0.851 | 110 | -     | -   | -     | -   | -     | -   | UNK   | hypo protein                                       |
| AAEL002905 | 0.745 | 175 | 0.783 | 192 | 0.686 | 204 | -     | -   | -     | -   | -     | -   | UNK   | conserved hypo protein                             |
| AAEL004525 | 0.653 | 146 | 0.632 | 168 | 0.720 | 163 | -     | -   | -     | -   | -     | -   | UNK   | hypo protein                                       |
| AAEL007791 | 0.697 | 251 | 0.656 | 293 | 0.714 | 280 | -     | -   | -     | -   | -     | -   | UNK   | conserved hypo protein                             |
| AAEL013846 | 0.718 | 102 | 0.749 | 116 | 0.799 | 102 | -     | -   | -     | -   | -     | -   | UNK   | hypo protein                                       |
| AAEL014972 | -     | -   | 0.504 | 19  | -     | -   | 0.792 | 14  | 0.724 | 9   | -     | -   | UNK   | hypo protein                                       |
| AAEL015114 | -     | -   | -     | -   | 0.668 | 174 | -     | -   | 0.834 | 142 | 0.722 | 98  | UNK   | conserved hypo protein                             |
| AAEL015451 | 0.738 | 61  | 0.554 | 46  | 0.732 | 54  | -     | -   | -     | -   | -     | -   | UNK   | hypo protein                                       |
| AAEL015509 | -     | -   | -     | -   | 0.669 | 28  | -     | -   | 0.745 | 15  | 0.582 | 14  | UNK   | conserved hypo protein                             |
| AAEL017937 | 0.796 | 15  | 0.669 | 14  | 0.816 | 9   | -     | -   | -     | -   | -     | -   | UNK   | hypo protein                                       |

\* Functional classes: 'CSR', chemosensory reception; 'CYT/STR', cytoskeletal and structural; 'DIV', diverse functions; 'PROT', proteolysis or 26S proteasome function; 'R/T/T', replication, transcription, and translation; 'ReDox', reduction/oxidation and oxidoreductive stress; 'SigT', Signal Transduction; 'TRP', transport or signaling; 'UNK', unknown functions.
